# Supplementary material
Source: Research Square preprint supplement (doi:10.21203/rs.3.rs-8996027/v1)
Supplement: Supplementary file 1 [file 9f19c1555fc850551408ff34.xlsx]

## Sheet: Table_S1
Table S1. Changes recorded in the CFU densities*, and growth rates calculated therefrom, after incubating the TMA isolates (plus E. coli) at -10°C in Luria broth (for the cultures lacking increase in CFU density, i.e. growth, proportions of FDA-stained cells were recorded at the end of the incubations).
Strain name	CFU present mL-1 culture at 0 h of incubation	CFU present mL-1 culture after 7 days of incubation	Percentage of the initial CFU density present in the culture after 7 days	CFU present mL-1 culture after 28 days of incubation	Percentage of the initial CFU density present in the culture after 28 days		Percentage of metabolically active (FDA-stained) cells remaining in the culture after 28 days
Arthrobacter sp. TRD_SC_1	1.23333e+06	1400000	113.5	3.33333e+06	270.3		Not applicable
Arthrobacter sp. TRD_SC_3	120000	153333	127.8	403333	336.1		Not applicable
Arthrobacter sp. TRD_SC_4	23333.3	250000	1071.4	400000	1714.3		Not applicable
Arthrobacter sp. TRD_SC_6	456667	546667	119.7	15000000	3284.7		Not applicable
Arthrobacter sp. TRD_SC_8	166667	203333	122	366667	220		Not applicable
Cryobacterium sp. TS_SC_7	4500000	3100000	68.9	2.63333e+06	58.5		99.3
Microbacterium sp. TRD_SC_10	7000000	2.36667e+06	33.8	2600000	37.1		95.8
Microbacterium sp. TW_SC_2	2.26667e+06	2.33333e+06	102.9	3.03333e+06	133.8		Not applicable
Microbacterium sp. TW_SC_3	8000000	3.03333e+07	379.2	57000000	712.5		Not applicable
Mycetocola sp. TRD_SC_2	53333.3	63333.3	118.8	110000	206.3		Not applicable
Paenarthrobacter sp. TRD_SC_7	466667	546667	117.1	833333	178.6		Not applicable
Pseudarthrobacter sp. TRD_SC_9	766667	810000	105.7	833333	108.7		Not applicable
Pseudarthrobacter sp. TS_SC_4	3.73333e+06	1.63333e+06	43.8	663333	17.8		18.8
Sanguibacter sp. TS_SC_8	1.66667e+06	1500000	90	116667	7		99.2
Streptomyces sp. TRD_SC_5	30.7	37	120.7	60	195.7		Not applicable
Ancylobacter sp. TW_SC_1	120000	56666.7	47.2	41666.7	34.7		87.2
Trichococcus sp. TS_SC_9	103333	120000	116.1	133333	129		Not applicable
Flavobacterium sp. TS_SC_2	2.66667e+06	3000000	112.5	3.33333e+06	125		Not applicable
Flavobacterium sp. TS_SC_5	5000000	1.93333e+06	38.7	246667	4.9		93.1
Acinetobacter sp. TW_SC_4	1.33333e+06	623333	46.8	26666.7	2		75.7
Aeromonas sp. TS_SC_11	1.33333e+06	1500000	112.5	1000000	75		95.5
Pseudomonas sp. TS_SC_1	633333	363333	57.4	110000	17.4		87.7
Pseudomonas sp. TS_SC_3	2.33333e+06	2.86667e+06	122.9	133333	5.7		35.1
Pseudomonas sp. TS_SC_10	1700000	1800000	105.9	433333	25.5		46.8
Pseudomonas sp. TS_SC_12	533333	650000	121.9	266667	50		67
Pseudomonas sp. TS_SC_13	133333	123333	92.5	13333.3	10		81.7
Psychrobacter sp. TS_SC_6	1.43333e+06	1.43333e+06	100	766667	53.5		90
Escherichia coli K-12	380000	5400	1.4	700	0		0
Growth rates calculated for the individual TMA isolates at -10°C in Luria broth
Strain name	CFU present mL-1 culture at 0 h	CFU present mL-1 culture after 28 days of incubation	Increase in CFU density after 28 days of incubation	Increased CFU density as a percentage of the initial (0 h) CFU density	Growth rate expressed as percentage of the initial CFU density that increased per day of incubation
Arthrobacter sp. TRD_SC_1	1.23333e+06	3.33333e+06	2100000	170.3	6.1
Arthrobacter sp. TRD_SC_3	120000	403333	283333	236.1	8.4
Arthrobacter sp. TRD_SC_4	23333.3	400000	376667	1614.3	57.7
Arthrobacter sp. TRD_SC_6	456667	15000000	1.45433e+07	3184.7	113.7
Arthrobacter sp. TRD_SC_8	166667	366667	200000	120	4.3
Cryobacterium sp. TS_SC_7	4500000	2.63333e+06	-1.86667e+06	-41.5	-1.5
Microbacterium sp. TRD_SC_10	7000000	2600000	-4400000	-62.9	-2.2
Microbacterium sp. TW_SC_2	2.26667e+06	3.03333e+06	766667	33.8	1.2
Microbacterium sp. TW_SC_3	8000000	57000000	49000000	612.5	21.9
Mycetocola sp. TRD_SC_2	53333.3	110000	56666.7	106.3	3.8
Paenarthrobacter sp. TRD_SC_7	466667	833333	366667	78.6	2.8
Pseudarthrobacter sp. TRD_SC_9	766667	833333	66666.7	8.7	0.3
Pseudarthrobacter sp. TS_SC_4	3.73333e+06	663333	-3070000	-82.2	-2.9
Sanguibacter sp. TS_SC_8	1.66667e+06	116667	-1550000	-93	-3.3
Streptomyces sp. TRD_SC_5	30.7	60	29.3	95.7	3.4
Ancylobacter sp. TW_SC_1	120000	41666.7	-78333.3	-65.3	-2.3
Trichococcus sp. TS_SC_9	103333	133333	30000	29	1
Flavobacterium sp. TS_SC_2	2.66667e+06	3.33333e+06	666667	25	0.9
Flavobacterium sp. TS_SC_5	5000000	246667	-4.75333e+06	-95.1	-3.4
Acinetobacter sp. TW_SC_4	1.33333e+06	26666.7	-1.30667e+06	-98	-3.5
Aeromonas sp. TS_SC_11	1.33333e+06	1000000	-333333	-25	-0.9
Pseudomonas sp. TS_SC_1	633333	110000	-523333	-82.6	-3
Pseudomonas sp. TS_SC_3	2.33333e+06	133333	-2200000	-94.3	-3.4
Pseudomonas sp. TS_SC_10	1700000	433333	-1.26667e+06	-74.5	-2.7
Pseudomonas sp. TS_SC_12	533333	266667	-266667	-50	-1.8
Pseudomonas sp. TS_SC_13	133333	13333.3	-120000	-90	-3.2
Psychrobacter sp. TS_SC_6	1.43333e+06	766667	-666667	-46.5	-1.7
Escherichia coli K-12	380000	700	-379300	-99.8	-3.6
* Every value given here is a mean of data obtained from three different experiments, where standard deviation was always <2% of the mean.

## Sheet: Table_S2
Table S2. Changes recorded in the CFU densities*, and growth rates calculated therefrom, after incubating the TMA isolates (plus E. coli) at 4°C in Luria broth
Strain name	CFU present mL-1 culture at 0 h of incubation	CFU present mL-1 culture after 7 days of incubation	Percentage of the initial CFU density present in the culture after 7 days	CFU present mL-1 culture after 14 days of incubation	Percentage of the initial CFU density present in the culture after 14 days
Arthrobacter sp. TRD_SC_1	60000	3.96667e+06	6611.1	54000000	90000
Arthrobacter sp. TRD_SC_3	9666.7	2900000	30000	36400000	376552
Arthrobacter sp. TRD_SC_4	263333	4.79667e+07	18215.2	3.88333e+08	147468
Arthrobacter sp. TRD_SC_6	4.36667e+06	1.73333e+08	3969.5	5.73333e+08	13129.8
Arthrobacter sp. TRD_SC_8	32333.3	4400000	13608.3	4.43333e+07	137113
Cryobacterium sp. TS_SC_7	766667	883333	115.2	3300000	430.4
Microbacterium sp. TRD_SC_10	146667	2.13333e+07	14545.5	4.73333e+08	322727
Microbacterium sp. TW_SC_2	200000	4.33333e+07	21666.7	330000000	165000
Microbacterium sp. TW_SC_3	270000	4.06667e+07	15061.7	1.06667e+08	39506.2
Mycetocola sp. TRD_SC_2	12000	209000	1741.7	2.23333e+06	18611.1
Paenarthrobacter sp. TRD_SC_7	4000000	440000000	11000	5.56667e+09	139167
Pseudarthrobacter sp. TRD_SC_9	223333	370000	165.7	1.31667e+08	58955.2
Pseudarthrobacter sp. TS_SC_4	190000	850000	447.4	2.56667e+07	13508.8
Sanguibacter sp. TS_SC_8	450000	946667	210.4	1.36667e+07	3037
Streptomyces sp. TRD_SC_5	143.3	203.3	141.9	11666.7	8139.5
Ancylobacter sp. TW_SC_1	11666.7	96000	822.9	1.23333e+06	10571.4
Trichococcus sp. TS_SC_9	50000	1.38333e+06	2766.7	9.43333e+06	18866.7
Flavobacterium sp. TS_SC_2	1433.3	2000	139.5	3500	244.2
Flavobacterium sp. TS_SC_5	14000	430000	3071.4	7.33333e+06	52381
Acinetobacter sp. TW_SC_4	39666.7	126667	319.3	2000000	5042
Aeromonas sp. TS_SC_11	26333.3	2.66667e+07	101266	90000000	341772
Pseudomonas sp. TS_SC_1	40000	7000000	17500	1.36333e+08	340833
Pseudomonas sp. TS_SC_3	80000	9.26667e+06	11583.3	1.47333e+07	18416.7
Pseudomonas sp. TS_SC_10	80000	1.06667e+06	1333.3	8.73333e+06	10916.7
Pseudomonas sp. TS_SC_12	17333.3	286667	1653.9	2.33333e+06	13461.5
Pseudomonas sp. TS_SC_13	9000	453333	5037	1.22333e+07	135926
Psychrobacter sp. TS_SC_6	103333	1.03333e+06	1000	2.16667e+07	20967.7
Escherichia coli K-12	15666.7	15000	95.7	16333.3	104.3
Growth rates calculated for the individual TMA isolates at 4°C in Luria broth
Strain name	CFU present mL-1 culture at 0 h	CFU present mL-1 culture after 14 days of incubation	Increase in CFU density after 14 days of incubation	Increased CFU density as a percentage of the initial (0 h) CFU density	Growth rate expressed as percentage of the initial CFU density that increased per day of incubation
Arthrobacter sp. TRD_SC_1	60000	54000000	53940000	89900	6421.4
Arthrobacter sp. TRD_SC_3	9666.7	36400000	3.63903e+07	376452	26889.4
Arthrobacter sp. TRD_SC_4	263333	3.88333e+08	388070000	147368	10526.3
Arthrobacter sp. TRD_SC_6	4.36667e+06	5.73333e+08	5.68967e+08	13029.8	930.7
Arthrobacter sp. TRD_SC_8	32333.3	4.43333e+07	44301000	137013	9786.7
Cryobacterium sp. TS_SC_7	766667	3300000	2.53333e+06	330.4	23.6
Microbacterium sp. TRD_SC_10	146667	4.73333e+08	4.73187e+08	322627	23044.8
Microbacterium sp. TW_SC_2	200000	330000000	329800000	164900	11778.6
Microbacterium sp. TW_SC_3	270000	1.06667e+08	1.06397e+08	39406.2	2814.7
Mycetocola sp. TRD_SC_2	12000	2.23333e+06	2.22133e+06	18511.1	1322.2
Paenarthrobacter sp. TRD_SC_7	4000000	5.56667e+09	5.56267e+09	139067	9933.3
Pseudarthrobacter sp. TRD_SC_9	223333	1.31667e+08	1.31443e+08	58855.2	4203.9
Pseudarthrobacter sp. TS_SC_4	190000	2.56667e+07	2.54767e+07	13408.8	957.8
Sanguibacter sp. TS_SC_8	450000	1.36667e+07	1.32167e+07	2937	209.8
Streptomyces sp. TRD_SC_5	143.3	11666.7	11523.3	8039.5	574.3
Ancylobacter sp. TW_SC_1	11666.7	1.23333e+06	1.22167e+06	10471.4	748
Trichococcus sp. TS_SC_9	50000	9.43333e+06	9.38333e+06	18766.7	1340.5
Flavobacterium sp. TS_SC_2	1433.3	3500	2066.7	144.2	10.3
Flavobacterium sp. TS_SC_5	14000	7.33333e+06	7.31933e+06	52281	3734.4
Acinetobacter sp. TW_SC_4	39666.7	2000000	1.96033e+06	4942	353
Aeromonas sp. TS_SC_11	26333.3	90000000	8.99737e+07	341672	24405.2
Pseudomonas sp. TS_SC_1	40000	1.36333e+08	1.36293e+08	340733	24338.1
Pseudomonas sp. TS_SC_3	80000	1.47333e+07	1.46533e+07	18316.7	1308.3
Pseudomonas sp. TS_SC_10	80000	8.73333e+06	8.65333e+06	10816.7	772.6
Pseudomonas sp. TS_SC_12	17333.3	2.33333e+06	2316000	13361.5	954.4
Pseudomonas sp. TS_SC_13	9000	1.22333e+07	1.22243e+07	135826	9701.9
Psychrobacter sp. TS_SC_6	103333	2.16667e+07	2.15633e+07	20867.7	1490.6
Escherichia coli K-12	15666.7	16333.3	666.7	4.3	0.3
* Every value given here is a mean of data obtained from three different experiments, where standard deviation was always <2% of the mean.

## Sheet: Table_S3
Table S3. Changes recorded in the CFU densities*, and growth rates calculated therefrom, after incubating the TMA isolates (plus E. coli) at 15°C in Luria broth.
Strain name	CFU present mL-1 culture at 0 h of incubation	CFU present mL-1 culture after 1 day of incubation	Percentage of the initial CFU density present in the culture after 1 day	CFU present mL-1 culture after 2 days of incubation	Percentage of the initial CFU density present in the culture after 2 days
Arthrobacter sp. TRD_SC_1	86666.7	11000000	12692.3	2.26667e+08	261538
Arthrobacter sp. TRD_SC_3	66666.7	5.66667e+06	8500	3.16667e+08	475000
Arthrobacter sp. TRD_SC_4	80000	5100000	6375	1.18333e+08	147917
Arthrobacter sp. TRD_SC_6	2500000	10600000	424	9.16667e+08	36666.7
Arthrobacter sp. TRD_SC_8	14000	11000000	78571.4	1.13333e+08	809524
Cryobacterium sp. TS_SC_7	900000	3200000	355.6	77000000	8555.6
Microbacterium sp. TRD_SC_10	510000	1.13333e+07	2222.2	2.66667e+08	52287.6
Microbacterium sp. TW_SC_2	135000	1.10667e+07	8197.5	254000000	188148
Microbacterium sp. TW_SC_3	110000	6.96667e+06	6333.3	1.01667e+08	92424.2
Mycetocola sp. TRD_SC_2	32333.3	58666.7	181.4	850000	2628.9
Paenarthrobacter sp. TRD_SC_7	270000	10000000	3703.7	7.83333e+08	290124
Pseudarthrobacter sp. TRD_SC_9	210000	11000000	5238.1	8.13333e+07	38730.2
Pseudarthrobacter sp. TS_SC_4	190000	2.16667e+07	11403.5	4.86667e+08	256140
Sanguibacter sp. TS_SC_8	436667	8200000	1877.9	42400000	9709.9
Streptomyces sp. TRD_SC_5	136.7	290	212.2	2166.7	1585.4
Ancylobacter sp. TW_SC_1	8633.3	9333.3	108.1	933333	10810.8
Trichococcus sp. TS_SC_9	60000	3.76667e+06	6277.8	1.08333e+07	18055.6
Flavobacterium sp. TS_SC_2	1100	1233.3	112.1	11000	1000
Flavobacterium sp. TS_SC_5	14000	11500000	82142.9	3.93333e+07	280952
Acinetobacter sp. TW_SC_4	156667	4000000	2553.2	124000000	79148.9
Aeromonas sp. TS_SC_11	46666.7	2.16667e+07	46428.6	3.31667e+08	710714
Pseudomonas sp. TS_SC_1	50000	10000000	20000	1.39333e+08	278667
Pseudomonas sp. TS_SC_3	80000	1.10667e+07	13833.3	1.93667e+08	242083
Pseudomonas sp. TS_SC_10	60000	8.06667e+06	13444.4	2.36667e+08	394444
Pseudomonas sp. TS_SC_12	17333.3	8.66667e+06	50000	8.93333e+07	515385
Pseudomonas sp. TS_SC_13	8000	3.91667e+06	48958.3	3.91667e+07	489583
Psychrobacter sp. TS_SC_6	96666.7	1.23333e+07	12758.6	2.40667e+08	248966
Escherichia coli K-12	15333.3	103333	673.9	1400000	9130.4
Growth rates calculated for the individual TMA isolates at 15°C in Luria broth
Strain name	CFU present mL-1 culture at 0 h	CFU present mL-1 culture after 2 days of incubation	Increase in CFU density after 2 days of incubation	Increased CFU density as a percentage of the initial (0 h) CFU density	Growth rate expressed as percentage of the initial CFU density that increased per day of incubation
Arthrobacter sp. TRD_SC_1	86666.7	2.26667e+08	226580000	261438	130719
Arthrobacter sp. TRD_SC_3	66666.7	3.16667e+08	316600000	474900	237450
Arthrobacter sp. TRD_SC_4	80000	1.18333e+08	1.18253e+08	147817	73908.3
Arthrobacter sp. TRD_SC_6	2500000	9.16667e+08	9.14167e+08	36566.7	18283.3
Arthrobacter sp. TRD_SC_8	14000	1.13333e+08	1.13319e+08	809424	404712
Cryobacterium sp. TS_SC_7	900000	77000000	76100000	8455.6	4227.8
Microbacterium sp. TRD_SC_10	510000	2.66667e+08	2.66157e+08	52187.6	26093.8
Microbacterium sp. TW_SC_2	135000	254000000	253865000	188048	94024.1
Microbacterium sp. TW_SC_3	110000	1.01667e+08	1.01557e+08	92324.2	46162.1
Mycetocola sp. TRD_SC_2	32333.3	850000	817667	2528.9	1264.4
Paenarthrobacter sp. TRD_SC_7	270000	7.83333e+08	7.83063e+08	290024	145012
Pseudarthrobacter sp. TRD_SC_9	210000	8.13333e+07	8.11233e+07	38630.2	19315.1
Pseudarthrobacter sp. TS_SC_4	190000	4.86667e+08	4.86477e+08	256040	128020
Sanguibacter sp. TS_SC_8	436667	42400000	4.19633e+07	9609.9	4805
Streptomyces sp. TRD_SC_5	136.7	2166.7	2030	1485.4	742.7
Ancylobacter sp. TW_SC_1	8633.3	933333	924700	10710.8	5355.4
Trichococcus sp. TS_SC_9	60000	1.08333e+07	1.07733e+07	17955.6	8977.8
Flavobacterium sp. TS_SC_2	1100	11000	9900	900	450
Flavobacterium sp. TS_SC_5	14000	3.93333e+07	3.93193e+07	280852	140426
Acinetobacter sp. TW_SC_4	156667	124000000	1.23843e+08	79048.9	39524.5
Aeromonas sp. TS_SC_11	46666.7	3.31667e+08	331620000	710614	355307
Pseudomonas sp. TS_SC_1	50000	1.39333e+08	1.39283e+08	278567	139283
Pseudomonas sp. TS_SC_3	80000	1.93667e+08	1.93587e+08	241983	120992
Pseudomonas sp. TS_SC_10	60000	2.36667e+08	2.36607e+08	394344	197172
Pseudomonas sp. TS_SC_12	17333.3	8.93333e+07	89316000	515285	257642
Pseudomonas sp. TS_SC_13	8000	3.91667e+07	3.91587e+07	489483	244742
Psychrobacter sp. TS_SC_6	96666.7	2.40667e+08	240570000	248866	124433
Escherichia coli K-12	15333.3	1400000	1.38467e+06	9030.4	4515.2
* Every value given here is a mean of data obtained from three different experiments, where standard deviation was always <2% of the mean.

## Sheet: Table_S4
Table S4. Changes recorded in the CFU densities# of the TMA isolates upon incubation in MS-acetate (MSAc) at 4°C.
Strain name	CFU present mL-1 culture at 0 h in MSAc medium	CFU present mL-1 culture after 14 days of incubation in MSAc medium	Percentage of the initial CFU density present in the culture after 14 days in MSAc medium	Increase in CFU density, expressed as a percentage of the initial level, after 14 days in MSAc medium	Increase in CFU density, expressed as a percentage of the initial level, after 14 days in MS solution	Percentage increase in CFU density attributable to acetate utilization*
Arthrobacter sp. TRD_SC_1	12000	17666.7	147.2	47.2	18.2	29.04
Arthrobacter sp. TRD_SC_3	344333	523333	152	52	0	51.98
Arthrobacter sp. TRD_SC_4	2000	1933.3	96.7	-3.3	-90	No growth
Arthrobacter sp. TRD_SC_6	2666.7	3000	112.5	12.5	20	No growth
Arthrobacter sp. TRD_SC_8	11000	12000	109.1	9.1	-23.3	9.09
Cryobacterium sp. TS_SC_7	37666.7	215333	571.7	471.7	-31.8	471.68
Microbacterium sp. TRD_SC_10	281000	313667	111.6	11.6	0	11.63
Microbacterium sp. TW_SC_2	137667	434333	315.5	215.5	217.1	No growth
Microbacterium sp. TW_SC_3	104333	167667	160.7	60.7	61.3	No growth
Mycetocola sp. TRD_SC_2	3666.7	4266.7	116.4	16.4	22.5	No growth
Paenarthrobacter sp. TRD_SC_7	22333.3	37666.7	168.7	68.7	71.9	No growth
Pseudarthrobacter sp. TRD_SC_9	12000	12000	100	0	-57	No growth
Pseudarthrobacter sp. TS_SC_4	17666.7	17666.7	100	0	-84.9	No growth
Sanguibacter sp. TS_SC_8	18000	19000	105.6	5.6	-29.4	5.56
Streptomyces sp. TRD_SC_5	1033	1033	100	0	0	No growth
Ancylobacter sp. TW_SC_1	24666.7	25000	101.4	1.4	-2.8	1.35
Trichococcus sp. TS_SC_9	2666.7	2766.7	103.8	3.8	6	No growth
Flavobacterium sp. TS_SC_2	10666.7	12666.7	118.8	18.8	-79.3	18.75
Flavobacterium sp. TS_SC_5	2833.3	3633.3	128.2	28.2	-88.2	28.24
Acinetobacter sp. TW_SC_4	14333.3	20666.7	144.2	44.2	47.5	No growth
Aeromonas sp. TS_SC_11	7000	7333.3	104.8	4.8	-67.2	4.76
Pseudomonas sp. TS_SC_1	11000	93333.3	848.5	748.5	700	48.48
Pseudomonas sp. TS_SC_3	18000	16000	88.9	-11.1	-54.9	No growth
Pseudomonas sp. TS_SC_10	3333.3	9166.7	275	175	200	No growth
Pseudomonas sp. TS_SC_12	24333.3	25000	102.7	2.7	-64.3	2.74
Pseudomonas sp. TS_SC_13	5000	5666.7	113.3	13.3	-8.3	13.33
Psychrobacter sp. TS_SC_6	12333.3	14666.7	118.9	18.9	-11.8	18.92
# Every value given here is a mean of data obtained from three different experiments, where standard deviation was always <2% of the mean.
* Final measure of growth due to acetate utilization. For a given organism this was defined exclusively as a positive remainder value obtained after subtracting the percentage increase in CFU density recorded in MS (here also, only positive values were considered) from the percentage increase in CFU density recorded in MSAc (here too, only positive values were considered).

## Sheet: Table_S5
Table S5. Changes recorded in the CFU densities# of the TMA isolates upon incubation in MS-agar (MSAg) at 4°C.
Strain name	CFU present mL-1 culture at 0 h in MSAg medium	CFU present mL-1 culture after 14 days of incubation in MSAg medium	Percentage of the initial CFU density present in the culture after 14 days in MSAg medium	Increase in CFU density, expressed as a percentage of the initial level, after 14 days in MSAg medium	Increase in CFU density, expressed as a percentage of the initial level, after 14 days in MS solution	Percentage increase in CFU density attributable to agar utilization*
Arthrobacter sp. TRD_SC_1	35333.3	516667	1462.3	1362.3	18.2	1344.1
Arthrobacter sp. TRD_SC_3	1000	20000	2000	1900	0	1900
Arthrobacter sp. TRD_SC_4	1666.7	12666.7	760	660	-90	660
Arthrobacter sp. TRD_SC_6	8666.7	40000	461.5	361.5	20	341.5
Arthrobacter sp. TRD_SC_8	5666.7	12000	211.8	111.8	-23.3	111.8
Cryobacterium sp. TS_SC_7	25000	25666.7	102.7	2.7	-31.8	2.7
Microbacterium sp. TRD_SC_10	200000	1700000	850	750	0	750
Microbacterium sp. TW_SC_2	333333	2.23333e+06	670	570	217.1	352.9
Microbacterium sp. TW_SC_3	433333	573333	132.3	32.3	61.3	No growth
Mycetocola sp. TRD_SC_2	3333.3	63666.7	1910	1810	22.5	1787.5
Paenarthrobacter sp. TRD_SC_7	63333.3	273333	431.6	331.6	71.9	259.7
Pseudarthrobacter sp. TRD_SC_9	16666.7	22000	132	32	-57	32
Pseudarthrobacter sp. TS_SC_4	22666.7	160000	705.9	605.9	-84.9	605.9
Sanguibacter sp. TS_SC_8	46666.7	48000	102.9	2.9	-29.4	2.9
Streptomyces sp. TRD_SC_5	14.3	32.3	225.6	125.6	0	125.6
Ancylobacter sp. TW_SC_1	8333.3	93333.3	1120	1020	-2.8	1020
Trichococcus sp. TS_SC_9	1333.3	15000	1125	1025	6	1019
Flavobacterium sp. TS_SC_2	15	166.7	1111.1	1011.1	-79.3	1011.1
Flavobacterium sp. TS_SC_5	216.7	783.3	361.5	261.5	-88.2	261.5
Acinetobacter sp. TW_SC_4	79000	166667	211	111	47.5	63.5
Aeromonas sp. TS_SC_11	4333.3	49000	1130.8	1030.8	-67.2	1030.8
Pseudomonas sp. TS_SC_1	30000	133333	444.4	344.4	700	No growth
Pseudomonas sp. TS_SC_3	14666.7	15333.3	104.6	4.6	-54.9	4.6
Pseudomonas sp. TS_SC_10	1666.7	33333.3	2000	1900	200	1700
Pseudomonas sp. TS_SC_12	20666.7	22666.7	109.7	9.7	-64.3	9.7
Pseudomonas sp. TS_SC_13	6000	43333.3	722.2	622.2	-8.3	622.2
Psychrobacter sp. TS_SC_6	5666.7	6166.7	108.8	8.8	-11.8	8.8
# Every value given here is a mean of data obtained from three different experiments, where standard deviation was always <2% of the mean.
* Final measure of growth due to agar utilization. For a given organism this was defined exclusively as a positive remainder value obtained after subtracting the percentage increase in CFU density recorded in MS (here also, only positive values were considered) from the percentage increase in CFU density recorded in MSAg (here too, only positive values were considered).

## Sheet: Table_S6
Table S6. Changes recorded in the CFU densities# of the TMA isolates upon incubation in MS-albumin (MSAl) at 4°C.
Strain name	CFU present mL-1 culture at 0 h in MSAl medium	CFU present mL-1 culture after 14 days of incubation in MSAl medium	Percentage of the initial CFU density present in the culture after 14 days in MSAl medium	Increase in CFU density, expressed as a percentage of the initial level, after 14 days in MSAl medium	Increase in CFU density, expressed as a percentage of the initial level, after 14 days in MS solution	Percentage increase in CFU density attributable to albumin utilization*
Arthrobacter sp. TRD_SC_1	11000	17666.7	160.6	60.6	18.2	42.4
Arthrobacter sp. TRD_SC_3	343333	523333	152.4	52.4	0	52.4
Arthrobacter sp. TRD_SC_4	1000	1933.3	193.3	93.3	-90	93.3
Arthrobacter sp. TRD_SC_6	1666.7	3000	180	80	20	60
Arthrobacter sp. TRD_SC_8	10000	12000	120	20	-23.3	20
Cryobacterium sp. TS_SC_7	36666.7	215333	587.3	487.3	-31.8	487.3
Microbacterium sp. TRD_SC_10	280000	313667	112	12	0	12
Microbacterium sp. TW_SC_2	136667	434333	317.8	217.8	217.1	0.7
Microbacterium sp. TW_SC_3	103333	167667	162.3	62.3	61.3	1
Mycetocola sp. TRD_SC_2	2666.7	4266.7	160	60	22.5	37.5
Paenarthrobacter sp. TRD_SC_7	21333.3	37666.7	176.6	76.6	71.9	4.7
Pseudarthrobacter sp. TRD_SC_9	11000	12000	109.1	9.1	-57	9.1
Pseudarthrobacter sp. TS_SC_4	16666.7	17666.7	106	6	-84.9	6
Sanguibacter sp. TS_SC_8	17000	19000	111.8	11.8	-29.4	11.8
Streptomyces sp. TRD_SC_5	33	72.7	220.2	120.2	0	120.2
Ancylobacter sp. TW_SC_1	23666.7	25000	105.6	5.6	-2.8	5.6
Trichococcus sp. TS_SC_9	1666.7	2766.7	166	66	6	60
Flavobacterium sp. TS_SC_2	9666.7	12666.7	131	31	-79.3	31
Flavobacterium sp. TS_SC_5	1833.3	3633.3	198.2	98.2	-88.2	98.2
Acinetobacter sp. TW_SC_4	13333.3	20666.7	155	55	47.5	7.5
Aeromonas sp. TS_SC_11	6000	7333.3	122.2	22.2	-67.2	22.2
Pseudomonas sp. TS_SC_1	10000	93333.3	933.3	833.3	700	133.3
Pseudomonas sp. TS_SC_3	17000	16000	94.1	-5.9	-54.9	No growth
Pseudomonas sp. TS_SC_10	2333.3	9166.7	392.9	292.9	200	92.9
Pseudomonas sp. TS_SC_12	23333.3	25000	107.1	7.1	-64.3	7.1
Pseudomonas sp. TS_SC_13	4000	5666.7	141.7	41.7	-8.3	41.7
Psychrobacter sp. TS_SC_6	11333.3	14666.7	129.4	29.4	-11.8	29.4
# Every value given here is a mean of data obtained from three different experiments, where standard deviation was always <2% of the mean.
* Final measure of growth due to albumin utilization. For a given organism this was defined exclusively as a positive remainder value obtained after subtracting the percentage increase in CFU density recorded in MS (here also, only positive values were considered) from the percentage increase in CFU density recorded in MSAl (here too, only positive values were considered).

## Sheet: Table_S7
Table S7. Changes recorded in the CFU densities# of the TMA isolates upon incubation in MS-benzoate (MSB) at 4°C.
Strain name	CFU present mL-1 culture at 0 h in MSB medium	CFU present mL-1 culture after 14 days of incubation in MSB medium	Percentage of the initial CFU density present in the culture after 14 days in MSB medium	Increase in CFU density, expressed as a percentage of the initial level, after 14 days in MSB medium	Increase in CFU density, expressed as a percentage of the initial level, after 14 days in MS solution	Percentage increase in CFU density attributable to benzoate utilization*
Arthrobacter sp. TRD_SC_1	12000	23000	191.7	91.7	18.2	73.5
Arthrobacter sp. TRD_SC_3	344333	570000	165.5	65.5	0	65.5
Arthrobacter sp. TRD_SC_4	2000	2000	100	0	-90	No growth
Arthrobacter sp. TRD_SC_6	2666.7	3000	112.5	12.5	20	No growth
Arthrobacter sp. TRD_SC_8	11000	12000	109.1	9.1	-23.3	9.1
Cryobacterium sp. TS_SC_7	37666.7	215333	571.7	471.7	-31.8	471.7
Microbacterium sp. TRD_SC_10	281000	3.20667e+06	1141.2	1041.2	0	1041.2
Microbacterium sp. TW_SC_2	137667	434333	315.5	215.5	217.1	No growth
Microbacterium sp. TW_SC_3	104333	167667	160.7	60.7	61.3	No growth
Mycetocola sp. TRD_SC_2	3666.7	4266.7	116.4	16.4	22.5	No growth
Paenarthrobacter sp. TRD_SC_7	22333.3	473333	2119.4	2019.4	71.9	1947.5
Pseudarthrobacter sp. TRD_SC_9	12000	12000	100	0	-57	No growth
Pseudarthrobacter sp. TS_SC_4	17666.7	17666.7	100	0	-84.9	No growth
Sanguibacter sp. TS_SC_8	18000	19000	105.6	5.6	-29.4	5.6
Streptomyces sp. TRD_SC_5	1033	1266.7	122.6	22.6	0	22.6
Ancylobacter sp. TW_SC_1	24666.7	24666.7	100	0	-2.8	No growth
Trichococcus sp. TS_SC_9	2666.7	2766.7	103.8	3.8	6	No growth
Flavobacterium sp. TS_SC_2	10666.7	12666.7	118.8	18.8	-79.3	18.8
Flavobacterium sp. TS_SC_5	2833.3	3633.3	128.2	28.2	-88.2	28.2
Acinetobacter sp. TW_SC_4	14333.3	340000	2372.1	2272.1	47.5	2224.6
Aeromonas sp. TS_SC_11	7000	7333.3	104.8	4.8	-67.2	4.8
Pseudomonas sp. TS_SC_1	11000	93333.3	848.5	748.5	700	48.5
Pseudomonas sp. TS_SC_3	18000	16000	88.9	-11.1	-54.9	No growth
Pseudomonas sp. TS_SC_10	3333.3	9166.7	275	175	200	No growth
Pseudomonas sp. TS_SC_12	24333.3	25000	102.7	2.7	-64.3	2.7
Pseudomonas sp. TS_SC_13	5000	5666.7	113.3	13.3	-8.3	13.3
Psychrobacter sp. TS_SC_6	12333.3	273333	2216.2	2116.2	-11.8	2116.2
# Every value given here is a mean of data obtained from three different experiments, where standard deviation was always <2% of the mean.
* Final measure of growth due to benzoate utilization. For a given organism this was defined exclusively as a positive remainder value obtained after subtracting the percentage increase in CFU density recorded in MS (here also, only positive values were considered) from the percentage increase in CFU density recorded in MSB (here too, only positive values were considered).

## Sheet: Table_S8
Table S8. Changes recorded in the CFU densities# of the TMA isolates upon incubation in MS-cellulose (MSCl) at 4°C.
Strain name	CFU present mL-1 culture at 0 h in MSCl medium	CFU present mL-1 culture after 14 days of incubation in MSCl medium	Percentage of the initial CFU density present in the culture after 14 days in MSCl medium	Increase in CFU density, expressed as a percentage of the initial level, after 14 days in MSCl medium	Increase in CFU density, expressed as a percentage of the initial level, after 14 days in MS solution	Percentage increase in CFU density attributable to cellulose utilization*
Arthrobacter sp. TRD_SC_1	11000	23333.3	212.1	112.1	18.2	93.9
Arthrobacter sp. TRD_SC_3	343333	4.23333e+06	1233	1133	0	1133
Arthrobacter sp. TRD_SC_4	1000	2400	240	140	-90	140
Arthrobacter sp. TRD_SC_6	1666.7	2066.7	124	24	20	4
Arthrobacter sp. TRD_SC_8	10000	12000	120	20	-23.3	20
Cryobacterium sp. TS_SC_7	36666.7	50666.7	138.2	38.2	-31.8	38.2
Microbacterium sp. TRD_SC_10	280000	1700000	607.1	507.1	0	507.1
Microbacterium sp. TW_SC_2	136667	2.23333e+06	1634.2	1534.2	217.1	1317.1
Microbacterium sp. TW_SC_3	103333	573333	554.8	454.8	61.3	393.6
Mycetocola sp. TRD_SC_2	2666.7	3666.7	137.5	37.5	22.5	15
Paenarthrobacter sp. TRD_SC_7	21333.3	25333.3	118.8	18.8	71.9	18.8
Pseudarthrobacter sp. TRD_SC_9	11000	22000	200	100	-57	100
Pseudarthrobacter sp. TS_SC_4	61666.7	160000	259.5	159.5	-84.9	159.5
Sanguibacter sp. TS_SC_8	17000	26333.3	154.9	54.9	-29.4	54.9
Streptomyces sp. TRD_SC_5	33	766.7	2323.2	2223.2	0	2223.2
Ancylobacter sp. TW_SC_1	23666.7	93333.3	394.4	294.4	-2.8	294.4
Trichococcus sp. TS_SC_9	1666.7	15000	900	800	6	794
Flavobacterium sp. TS_SC_2	9666.7	24666.7	255.2	155.2	-79.3	155.2
Flavobacterium sp. TS_SC_5	1833.3	2166.7	118.2	18.2	-88.2	18.2
Acinetobacter sp. TW_SC_4	13333.3	166667	1250	1150	47.5	1102.5
Aeromonas sp. TS_SC_11	6000	49000	816.7	716.7	-67.2	716.7
Pseudomonas sp. TS_SC_1	10000	15666.7	156.7	56.7	700	No growth
Pseudomonas sp. TS_SC_3	17000	17000	100	0	-54.9	No growth
Pseudomonas sp. TS_SC_10	2333.3	33333.3	1428.6	1328.6	200	1128.6
Pseudomonas sp. TS_SC_12	23333.3	24333.3	104.3	4.3	-64.3	4.3
Pseudomonas sp. TS_SC_13	4000	7333.3	183.3	83.3	-8.3	83.3
Psychrobacter sp. TS_SC_6	11333.3	12666.7	111.8	11.8	-11.8	11.8
# Every value given here is a mean of data obtained from three different experiments, where standard deviation was always <2% of the mean.
* Final measure of growth due to cellulose utilization. For a given organism this was defined exclusively as a positive remainder value obtained after subtracting the percentage increase in CFU density recorded in MS (here also, only positive values were considered) from the percentage increase in CFU density recorded in MSCl (here too, only positive values were considered).

## Sheet: Table_S9
Table S9. Changes recorded in the CFU densities# of the TMA isolates upon incubation in MS-chitin (MSCt) at 4°C.
Strain name	CFU present mL-1 culture at 0 h in MSCt medium	CFU present mL-1 culture after 14 days of incubation in MSCt medium	Percentage of the initial CFU density present in the culture after 14 days in MSCt medium	Increase in CFU density, expressed as a percentage of the initial level, after 14 days in MSCt medium	Increase in CFU density, expressed as a percentage of the initial level, after 14 days in MS solution	Percentage increase in CFU density attributable to chitin utilization*
Arthrobacter sp. TRD_SC_1	35333.3	36333.3	102.8	2.8	18.2	No growth
Arthrobacter sp. TRD_SC_3	1000	11666.7	1166.7	1066.7	0	1066.7
Arthrobacter sp. TRD_SC_4	8666.7	8666.7	100	0	-90	No growth
Arthrobacter sp. TRD_SC_6	5666.7	6333.3	111.8	11.8	20	No growth
Arthrobacter sp. TRD_SC_8	1666.7	2066.7	124	24	-23.3	24
Cryobacterium sp. TS_SC_7	25000	466667	1866.7	1766.7	-31.8	1766.7
Microbacterium sp. TRD_SC_10	200000	206667	103.3	3.3	0	3.3
Microbacterium sp. TW_SC_2	333333	346667	104	4	217.1	No growth
Microbacterium sp. TW_SC_3	433333	286667	66.2	-33.9	61.3	No growth
Mycetocola sp. TRD_SC_2	3333.3	54333.3	1630	1530	22.5	1507.5
Paenarthrobacter sp. TRD_SC_7	63333.3	150000	236.8	136.8	71.9	65
Pseudarthrobacter sp. TRD_SC_9	16666.7	19666.7	118	18	-57	18
Pseudarthrobacter sp. TS_SC_4	22666.7	22666.7	100	0	-84.9	No growth
Sanguibacter sp. TS_SC_8	46666.7	180000	385.7	285.7	-29.4	285.7
Streptomyces sp. TRD_SC_5	11	236.7	2151.5	2051.5	0	2051.5
Ancylobacter sp. TW_SC_1	8333.3	10666.7	128	28	-2.8	28
Trichococcus sp. TS_SC_9	1333.3	1466.7	110	10	6	4
Flavobacterium sp. TS_SC_2	1500	1833.3	122.2	22.2	-79.3	22.2
Flavobacterium sp. TS_SC_5	2500	3633.3	145.3	45.3	-88.2	45.3
Acinetobacter sp. TW_SC_4	79000	96666.7	122.4	22.4	47.5	No growth
Aeromonas sp. TS_SC_11	4333.3	23666.7	546.2	446.2	-67.2	446.2
Pseudomonas sp. TS_SC_1	30000	173333	577.8	477.8	700	No growth
Pseudomonas sp. TS_SC_3	14666.7	7666.7	52.3	-47.7	-54.9	No growth
Pseudomonas sp. TS_SC_10	1666.7	16333.3	980	880	200	680
Pseudomonas sp. TS_SC_12	20666.7	32333.3	156.5	56.5	-64.3	56.5
Pseudomonas sp. TS_SC_13	6000	53333.3	888.9	788.9	-8.3	788.9
Psychrobacter sp. TS_SC_6	5666.7	15666.7	276.5	176.5	-11.8	176.5
# Every value given here is a mean of data obtained from three different experiments, where standard deviation was always <2% of the mean.
* Final measure of growth due to chitin utilization. For a given organism this was defined exclusively as a positive remainder value obtained after subtracting the percentage increase in CFU density recorded in MS (here also, only positive values were considered) from the percentage increase in CFU density recorded in MSCt (here too, only positive values were considered).

## Sheet: Table_S10
Table S10. Changes recorded in the CFU densities# of the TMA isolates upon incubation in MS-hexadecane (MSH) at 4°C.
Strain name	CFU present mL-1 culture at 0 h in MSH medium	CFU present mL-1 culture after 14 days of incubation in MSH medium	Percentage of the initial CFU density present in the culture after 14 days in MSH medium	Increase in CFU density, expressed as a percentage of the initial level, after 14 days in MSH medium	Increase in CFU density, expressed as a percentage of the initial level, after 14 days in MS solution	Percentage increase in CFU density attributable to hexadecane utilization*
Arthrobacter sp. TRD_SC_1	11000	12333.3	112.1	12.1	18.2	No growth
Arthrobacter sp. TRD_SC_3	343333	380000	110.7	10.7	0	10.7
Arthrobacter sp. TRD_SC_4	1266.7	22666.7	1789.5	1689.5	-90	1689.5
Arthrobacter sp. TRD_SC_6	1666.7	31666.7	1900	1800	20	1780
Arthrobacter sp. TRD_SC_8	10000	12000	120	20	-23.3	20
Cryobacterium sp. TS_SC_7	36666.7	50666.7	138.2	38.2	-31.8	38.2
Microbacterium sp. TRD_SC_10	280000	1700000	607.1	507.1	0	507.1
Microbacterium sp. TW_SC_2	136667	143333	104.9	4.9	217.1	No growth
Microbacterium sp. TW_SC_3	103333	106667	103.2	3.2	61.3	No growth
Mycetocola sp. TRD_SC_2	2666.7	3666.7	137.5	37.5	22.5	15
Paenarthrobacter sp. TRD_SC_7	21333.3	25333.3	118.8	18.8	71.9	No growth
Pseudarthrobacter sp. TRD_SC_9	11000	22000	200	100	-57	100
Pseudarthrobacter sp. TS_SC_4	61666.7	160000	259.5	159.5	-84.9	159.5
Sanguibacter sp. TS_SC_8	17000	26333.3	154.9	54.9	-29.4	54.9
Streptomyces sp. TRD_SC_5	33	200	606.1	506.1	0	506.1
Ancylobacter sp. TW_SC_1	23666.7	93333.3	394.4	294.4	-2.8	294.4
Trichococcus sp. TS_SC_9	1666.7	1900	114	14	6	8
Flavobacterium sp. TS_SC_2	9666.7	47000	486.2	386.2	-79.3	386.2
Flavobacterium sp. TS_SC_5	1833.3	2166.7	118.2	18.2	-88.2	18.2
Acinetobacter sp. TW_SC__4	13333.3	15666.7	117.5	17.5	47.5	No growth
Aeromonas sp. TS_SC_11	6000	49000	816.7	716.7	-67.2	716.7
Pseudomonas sp. TS_SC_1	10000	15666.7	156.7	56.7	700	No growth
Pseudomonas sp. TS_SC_3	17000	17000	100	0	-54.9	No growth
Pseudomonas sp. TS_SC_10	2333.3	3300	141.4	41.4	200	No growth
Pseudomonas sp. TS_SC_12	23333.3	24333.3	104.3	4.3	-64.3	4.3
Pseudomonas sp. TS_SC_13	4000	7333.3	183.3	83.3	-8.3	83.3
Psychrobacter sp. TS_SC_6	11333.3	94000	829.4	729.4	-11.8	729.4
# Every value given here is a mean of data obtained from three different experiments, where standard deviation was always <2% of the mean.
* Final measure of growth due to hexadecane utilization. For a given organism this was defined exclusively as a positive remainder value obtained after subtracting the percentage increase in CFU density recorded in MS (here also, only positive values were considered) from the percentage increase in CFU density recorded in MSH (here too, only positive values were considered).

[truncated: 47 more sheets: Table_S11, Table_S12, Table_S13, Table_S14, Table_S15, Table_S16, Table_S17, Table_S18, Table_S19, Table_S20, Table_S21, Table_S22, Table_S23, Table_S24, Table_S25, Table_S26, Table_S27, Table_S28, Table_S29, Table_S30 …]
