# Supplementary material
Source: Research Square preprint supplement (doi:10.21203/rs.3.rs-8996027/v1)
Supplement: Supplementary file 2 [file d266894f9b9f43bc63618942.docx]

**Cryo-adapted bacterial copiotrophs from a Trans-Himalayan lake-desert ecosystem as biogeothermometers of warming and mitigators of microbiome perturbation**

Sumit Chatterjee1, Subhajit Dutta1, Jit Ghosh1, Swapneel Saha1, Mahamadul Mondal1, Jagannath Sarkar1,$, Nibendu Mondal1,#, and Wriddhiman Ghosh1,*

**Author Address:**

1 Department of Biological Sciences, Bose Institute, Kolkata, India

**Present Address:**

$ Faculty of Engineering and Natural Sciences, Tampere University, Finland

# Department of Microbiology and Cell Science, Fort Lauderdale Research and Education Center, University of Florida, USA

**Correspondence:**

***** Wriddhiman Ghosh (wriman@jcbose.ac.in, wriman@rediffmail.com)

**Keywords:** Trans-Himalayan deserts and lakes, psychrophilic and cryophilic bacteria, climate warming, antibiosis, microbiome protection, organic matter degradation

**Running title:** Ecological essentials of cryo-adapted copiotrophs

**Table of Contents**

**Supplementary Tables**

**(All SI tables, except S32, S33 and S34, have been given in individual sheets of an Excel Workbook named Supplementary_Dataset)**

**Table S1.** Changes recorded in the CFU densities, and growth rates calculated therefrom, after incubating the TMA isolates (plus *E*. *coli*) at -10°C in Luria broth (for the cultures lacking increase in CFU density, i.e. growth, proportions of FDA-stained cells were recorded at the end of the incubations).

**Table S2.** Changes recorded in the CFU densities, and growth rates calculated therefrom, after incubating the TMA isolates (plus *E*. *coli*) at 4°C in Luria broth.

**Table S3.** Changes recorded in the CFU densities, and growth rates calculated therefrom, after incubating the TMA isolates (plus *E*. *coli*) at 15°C in Luria broth.

**Table S4.** Changes recorded in the CFU densities of the TMA isolates upon incubation in MS-acetate (MSAc) at 4°C.

**Table S5.** Changes recorded in the CFU densities of the TMA isolates upon incubation in MS-agar (MSAg) at 4°C.

**Table S6.** Changes recorded in the CFU densities of the TMA isolates upon incubation in MS-albumin (MSAl) at 4°C.

**Table S7.** Changes recorded in the CFU densities of the TMA isolates upon incubation in MS-benzoate (MSB) at 4°C.

**Table S8.** Changes recorded in the CFU densities of the TMA isolates upon incubation in MS-cellulose (MSCl) at 4°C.

**Table S9.** Changes recorded in the CFU densities of the TMA isolates upon incubation in MS-chitin (MSCt) at 4°C.

**Table S10.** Changes recorded in the CFU densities of the TMA isolates upon incubation in MS-hexadecane (MSH) at 4°C.

**Table S11.** Changes recorded in the CFU densities of the TMA isolates upon incubation in MS-pectin (MSP) at 4°C.

**Table S12.** Changes recorded in the CFU densities of the TMA isolates upon incubation in MS-starch (MSS) at 4°C.

**Table S13.** Changes recorded in the CFU densities of the TMA isolates upon incubation in MS-xylan (MSX) at 4°C.

**Table S14.** Changes recorded in the CFU densities of the TMA isolates upon incubation in MS-acetate (MSAc) at -10°C.

**Table S15.** Changes recorded in the CFU densities of the TMA isolates upon incubation in MS-agar (MSAg) at -10°C.

**Table S16.** Changes recorded in the CFU densities of the TMA isolates upon incubation in MS-albumin (MSAl) at -10°C.

**Table S17.** Changes recorded in the CFU densities of the TMA isolates upon incubation in MS-benzoate (MSB) at -10°C.

**Table S18.** Changes recorded in the CFU densities of the TMA isolates upon incubation in MS-cellulose (MSCl) at -10°C.

**Table S19.** Changes recorded in the CFU densities of the TMA isolates upon incubation in MS-chitin (MSCt) at -10°C.

**Table S20.** Changes recorded in the CFU densities of the TMA isolates upon incubation in MS-hexadecane (MSH) at -10°C.

**Table S21.** Changes recorded in the CFU densities of the TMA isolates upon incubation in MS-pectin (MSP) at -10°C.

**Table S22.** Changes recorded in the CFU densities of the TMA isolates upon incubation in MS-starch (MSS) at -10°C.

**Table S23.** Changes recorded in the CFU densities of the TMA isolates upon incubation in MS-xylan (MSX) at -10°C.

**Table S24.** Changes recorded in the CFU densities of the TMA isolates upon incubation in minimal salts (MS) solution at 4°C.

**Table S25.** Changes recorded in the CFU densities of the TMA isolates upon incubation in minimal salts (MS) solution at -10°C.

**Table S26.** Changes recorded in the CFU densities, and growth rates calculated therefrom, after incubating the TMA isolates (plus *E*. *coli*) at 28°C in Luria broth (for the cultures lacking increase in CFU density, i.e. growth, proportions of FDA-stained cells were recorded at the end of the incubations).

**Table S27.** Changes recorded in the CFU densities, and growth rates calculated therefrom, after incubating the TMA isolates (plus *E*. *coli*) at 37°C in Luria broth (for the cultures lacking increase in CFU density, i.e. growth, proportions of FDA-stained cells were recorded at the end of the incubations).

**Table S28.** Decreases in CFU densities, and corresponding negative growths, recorded for the TMA isolates upon incubation at 42°C in Luria broth (since all the cultures lacked increase in CFU density, i.e. growth, proportions of FDA-stained cells were recorded for all of them at the end of the incubations).

**Table S29.** Key attributes of the assembled whole genome sequences of the 15 TMA isolates shortlisted.

**Table S30.** Key attributes of the assembled metagenomes obtained from the weathered rock dust, lake-water, and lake-sediment samples.

**Table S31.** Taxonomic affiliation (up to the domain and/or phylum level) of the protein-coding sequences (CDSs) predicted within the assembled metagenomes of the weathered rock dust, lake-water, and lake-sediment samples.

**Table S32.** Taxonomic classification of such metagenomic reads from the rock-dust sample that corresponded to bacterial or archaeal 16S rRNA gene sequences.

**Table S33.** Taxonomic classification of such metagenomic reads from the lake-water sample that corresponded to bacterial or archaeal 16S rRNA gene sequences.

**Table S34.** Taxonomic classification of such metagenomic reads from the lake-sediment sample that corresponded to bacterial or archaeal 16S rRNA gene sequences.

**Table S35.** Proportions of metagenomic reads from the rock-dust, lake-water, and lake-sediment samples that individually matched sequences from the genomes of the representative TMA isolates.

**Table S36.** eggNOG‑based annotation of all protein-coding sequences (CDSs) identified within the genome of *Arthrobacter* sp. TRD_SC_6.

**Table S37.** eggNOG‑based annotation of all protein-coding sequences (CDSs) identified within the genome of *Cryobacterium* sp. TS_SC_7.

**Table S38.** eggNOG‑based annotation of all protein-coding sequences (CDSs) identified within the genome of *Microbacterium* sp. TW_SC_2.

**Table S39.** eggNOG‑based annotation of all protein-coding sequences (CDSs) identified within the genome of *Mycetocola* sp. TRD_SC_2.

**Table S40.** eggNOG‑based annotation of all protein-coding sequences (CDSs) identified within the genome of *Paenarthrobacter* sp. TRD_SC_7.

**Table S41.** eggNOG‑based annotation of all protein-coding sequences (CDSs) identified within the genome of *Pseudarthrobacter* sp. TRD_SC_9.

**Table S42.** eggNOG‑based annotation of all protein-coding sequences (CDSs) identified within the genome of *Sanguibacter* sp. TS_SC_8.

**Table S43.** eggNOG‑based annotation of all protein-coding sequences (CDSs) identified within the genome of *Streptomyces* sp. TRD_SC_5.

**Table S44.** eggNOG‑based annotation of all protein-coding sequences (CDSs) identified within the genome of *Trichococcus* sp. TS_SC_9.

**Table S45.** eggNOG‑based annotation of all protein-coding sequences (CDSs) identified within the genome of *Flavobacterium* sp. TS_SC_5.

**Table S46.** eggNOG‑based annotation of all protein-coding sequences (CDSs) identified within the genome of *Ancylobacter* sp. TW_SC_1.

**Table S47.** eggNOG‑based annotation of all protein-coding sequences (CDSs) identified within the genome of *Acinetobacter* sp. TW_SC_4.

**Table S48.** eggNOG‑based annotation of all protein-coding sequences (CDSs) identified within the genome of *Aeromonas* *salmonicida* TS_SC_11.

**Table S49.** eggNOG‑based annotation of all protein-coding sequences (CDSs) identified within the genome of *Pseudomonas* sp. TS_SC_3.

**Table S50.** eggNOG‑based annotation of all protein-coding sequences (CDSs) identified within the genome of *Psychrobacter* sp. TS_SC_6.

**Table S51.** Number of genes identified in the different TMA isolates for adaptation to low temperatures, and low as well as high temperatures.

**Table S52.** Number of genes identified in the rock-dust, lake-water, and lake-sediment metagenomes for adaptation to low temperatures, and low as well as high temperatures.

**Table S53.** Number of genes identified in the different TMA isolates under the different categories of carbohydrate-active enzymes (CAZymes).

**Table S54.** Number of genes identified in the analyzed metagenomes under the different categories of carbohydrate-active enzymes (CAZymes).

**Table S55.** Annotation details of the key genes concerned with the biosynthesis of different antibiotics, as identified within the eggNOG-based CDS catalogues of the 15 TMA isolates.

**Table S56.** AntiSMASH-based annotation details of the genes concerned with secondary metabolites biosynthesis, as identified within the Prodigal-based gene (ORF) catalogues of the 15 TMA isolates.

**Table S57.** CARD-RGI-based annotation details of the genes concerned with antibiotic resistance, as identified within the genome sequences of the 15 TMA isolates.

**Table S58.** Members retrieved previously from other cold/frigid habitats of the world for the genera that were currently isolated from the Tso Moriri area.

**Table S59.** Members retrieved previously from discrete mesic/hot habitats for the genera that were currently isolated from the Tso Moriri area.

**Table S60.** Minimum and maximum growth temperatures known (in the literature) thus far for the global strains of the genera that were isolated in this study from the Tso Moriri area.

**Supplementary Figures**

**Figure S1.** Flow cytometry-derived dot plots depicting what proportions of cells were stained by FDA (after 28 days of incubation) in the LB cultures of the 14 TMA isolates incapable of growing at -10°C.

**Figure S2.** Correlation between the proportions of divisible and metabolically-active cells across the species incapable of growing in Luria broth at (a) -10°C, (b) 28°C, (c) 37°C, or (d) 42°C.

**Figure S3.** Flow cytometry-derived dot plots depicting what proportions of cells were stained by FDA in the LB cultures of the isolates incapable of growing after (**a**) four days of incubation at 28°C, and (**b**) two days of incubation at 37°C.

**Figure S4.** Flow cytometry-derived dot plots depicting what proportions of cells were stained by FDA in the LB cultures of the 27 TMA isolates after 24 h incubation at 42°C.

**Figure S5.** Functional-category-wise numeral distribution of genes putatively concerned with low temperature adaptation, and low as well as high temperature adaptation, within the genomes of the 15 TMA isolates selected on a “one per genus” basis.

**Figure S6.** Functional-category-wise numeral distribution of genes putatively concerned with carbohydrate metabolism (encoding the different categories of carbohydrate-active enzymes), within the genomes of the 15 TMA isolates selected on a “one per genus” basis.

**Figure S7.** Growth temperature windows of the bacterial genera under which the different TMA isolates were classified.

**Supplementary References**

**References used in Table S58**

**References used in Table S59**

**References used in Table S60**

**Supplementary Tables**

**Table S32.** Taxonomic classification of such metagenomic reads from the rock-dust sample that corresponded to bacterial or archaeal 16S rRNA gene sequences.

| **Phylum (no. of 16S reads ascribed to the phylum)** | **Class** | **Genus (no. of 16S reads ascribed to the genus)** |
| --- | --- | --- |
| **Archaea (total reads: 649)** | | |
| Nitrososphaerota (644) | - | *Nitrososphaera* (625) |
| Unclassified Archaea (5) | - | - |
| **Bacteria (total reads: 30360)** | | |
| Actinobacteria / Actinomycetota (16606) | - | *Rubrobacter* (1028) |
| - | *Blastococcus* (803) |
| - | *Modestobacter* (395) |
| - | *Geodermatophilus* (306) |
| - | *Solirubrobacter* (223) |
| - | *Parviterribacter* (188) |
| - | *Microlunatus* (166) |
| - | *Nocardioides* (156) |
| - | *Marmoricola* (113) |
| - | *Acidiferrimicrobium* (105) |
| - | *Pseudonocardia* (73) |
| - | *Actinoplanes* (68) |
| - | *Conexibacter* (56) |
| - | *Patulibacter* (45) |
| - | *Aquipuribacter* (43) |
| - | *Rhabdothermincola* (42) |
| - | *Auraticoccus* (41) |
| - | *Goekera* (41) |
| - | *Gaiella* (33) |
| - | *Paraconexibacter* (24) |
| - | *Baekduia* (20) |
| - | *Thalassiella* (19) |
| - | *Actinotalea* (17) |
| - | *Kribbella* (16) |
| - | *Cellulomonas* (16) |
| - | *Arthrobacter* (16) |
| - | *Angustibacter* (15) |
| - | *Desertimonas* (13) |
| - | *Euzebya* (12) |
| - | *Trujillonella* (11) |
| - | *Sporichthya* (11) |
| - | *Virgisporangium* (9) |
| - | *Couchioplanes* (9) |
| - | *Jatrophihabitans* (8) |
| - | *Iamia* (8) |
| - | *Actinomycetospora* (7) |
| - | *Motilibacter* (7) |
| - | *Actinomarinicola* (7) |
| - | *Klenkia* (6) |
| - | *Micromonospora* (4) |
| - | *Aeromicrobium* (3) |
| - | *Kocuria* (3) |
| - | *Aquihabitans* (3) |
| - | *Cutibacterium* (2) |
| - | *Quadrisphaera* (2) |
| - | *Kineococcus* (2) |
| - | *Dactylosporangium* (2) |
| - | *Oerskovia* (2) |
| - | *Mycobacterium* (2) |
| - | *Ilumatobacter* (2) |
| - | *Nakamurella* (1) |
| - | *Phytohabitans* (1) |
| - | *Catellatospora* (1) |
| - | *Lentzea* (1) |
| - | *Ornithinimicrobium* (1) |
| - | *Cryobacterium* (1) |
| - | *Cellulosimicrobium* (1) |
| - | *Georgenia* (1) |
| - | *Streptomyces* (1) |
| - | *Cryptosporangium* (1) |
| - | *Egibacter* (1) |
| - | *Collinsella* (1) |
| Proteobacteria / Pseudomonadota (5717) | Alphaproteobacteria (4853) | *Rubellimicrobium* (307) |
| *Microvirga* (194) |
| *Sphingomonas* (125) |
| *Craurococcus* (56) |
| *Roseomonas* (55) |
| *Asticcacaulis* (52) |
| *Sphingosinicella* (34) |
| *Phenylobacterium* (31) |
| *Sphingopyxis* (19) |
| *Caulobacter* (18) |
| *Devosia* (16) |
| *Bosea* (11) |
| *Terrihabitans* (8) |
| *Croceibacterium* (6) |
| *Phreatobacter* (6) |
| *Dankookia* (5) |
| *Psychroglaciecola* (5) |
| *Salinarimonas* (5) |
| *Blastomonas* (4) |
| *Novosphingobium* (4) |
| *Methylobacterium* (4) |
| *Bradyrhizobium* (4) |
| *Belnapia* (3) |
| *Parasphingopyxis* (3) |
| *Nitrobacter* (3) |
| *Crenalkalicoccus* (2) |
| *Skermanella* (2) |
| *Desertibacter* (2) |
| *Sphingobium* (2) |
| *Aureimonas* (2) |
| *Paracoccus* (2) |
| *Roseococcus* (1) |
| *Sediminicoccus* (1) |
| *Caldovatus* (1) |
| *Chakrabartia* (1) |
| *Allosphingosinicella* (1) |
| *Rhizorhabdus* (1) |
| *Enterovirga* (1) |
| *Mangrovicella* (1) |
| *Methyloceanibacter* (1) |
| *Limoniibacter* (1) |
| *Chelatococcus* (1) |
| *Limimaricola* (1) |
| Betaproteobacteria (535) | *Nitrosomonas* (68) |
| *Massilia* (26) |
| *Ramlibacter* (20) |
| *Nitrosospira* (13) |
| *Variovorax* (8) |
| *Piscinibacter* (5) |
| *Noviherbaspirillum* (4) |
| *Caenimonas* (3) |
| *Rhizobacter* (3) |
| *Oxalicibacterium* (2) |
| *Herbaspirillum* (2) |
| *Aquabacterium* (1) |
| *Acidovorax* (1) |
| *Rugamonas* (1) |
| Deltaproteobacteria (84) | *Labilithrix* (5) |
| *Kofleria* (2) |
| *Anaeromyxobacter* (1) |
| *Simulacricoccus* (1) |
| Gammaproteobacteria (79) | *Escherichia*/Shigella (21) |
| *Aeromonas* (3) |
| *Cellvibrio* (2) |
| *Pseudomonas* (2) |
| *Pseudoxanthomonas* (2) |
| *Acinetobacter* (1) |
| *Stenotrophomonas* (1) |
| Oligoflexia (29) | *Peredibacter* (25) |
| *Oligoflexus* (1) |
| Acidobacteriota (1784) | - | *Aridibacter* (183) |
| - | *Blastocatella* (151) |
| - | Gp7 (62) |
| - | Gp16 (44) |
| - | Gp6 (41) |
| - | Gp3 (19) |
| - | *Brevitalea* (14) |
| - | *Luteitalea* (7) |
| - | *Stenotrophobacter* (5) |
| - | *Arenimicrobium* (4) |
| - | *Vicinamibacter* (4) |
| - | *Bryobacter* (3) |
| - | Gp4 (2) |
| - | *Tellurimicrobium* (1) |
| - | Gp17 (1) |
| Bacteroidetes / Bacteroidota (1190) | - | *Adhaeribacter* (234) |
| - | *Segetibacter* (100) |
| - | *Segatella* (95) |
| - | *Rhodocytophaga* (71) |
| - | *Flavisolibacter* (42) |
| - | *Hymenobacter* (23) |
| - | *Sporocytophaga* (9) |
| - | *Spirosoma* (7) |
| - | *Ferruginibacter* (5) |
| - | *Leyella* (5) |
| - | *Niveitalea* (3) |
| - | *Flavitalea* (3) |
| - | *Ohtaekwangia* (3) |
| - | *Prevotellamassilia* (3) |
| - | *Flaviaestuariibacter* (2) |
| - | *Niastella* (2) |
| - | *Pedobacter* (2) |
| - | *Flavobacterium* (2) |
| - | *Cnuella* (1) |
| - | *Paraflavitalea* (1) |
| - | *Paracnuella* (1) |
| - | *Nibribacter* (1) |
| - | *Chryseolinea* (1) |
| - | *Hallella* (1) |
| - | *Daejeonella* (1) |
| Gemmatimonadota (952) | - | *Roseisolibacter* (208) |
| - | *Longimicrobium* (159) |
| - | *Gemmatirosa* (34) |
| - | *Gemmatimonas* (27) |
| Armatimonadetes / Armatimonadota (369) | - | *Armatimonadetes*_gp4 (125) |
| - | *Armatimonas* (46) |
| - | *Fimbriimonadia* (4) |
| - | *Fimbriimonas* (4) |
| - | *Capsulimonas* (3) |
| - | Armatimonadetes_gp2 (1) |
| Planctomycetota (261) | - | *Tepidisphaera* (124) |
| - | *Urbifossiella* (5) |
| - | *Singulisphaera* (4) |
| - | *Aquisphaera* (3) |
| - | *Tundrisphaera* (1) |
| - | *Tautonia* (1) |
| Chloroflexi / Chloroflexota (175) | - | *Kallotenue* (120) |
| - | *Tepidiforma* (1) |
| Deinococcus-Thermus / Deinococcota (175) | - | *Truepera* (99) |
| - | *Deinococcus* (44) |
| - | *Deinobacterium* (2) |
| Firmicutes / Bacillota (43) | - | *Faecalibacterium* (7) |
| - | *Ruminococcoides* (3) |
| - | *Gemmiger* (2) |
| - | *Vescimonas* (2) |
| - | *Agathobacter* (2) |
| - | *Dysosmobacter* (1) |
| - | *Niallia* (1) |
| - | *Anaerovibrio* (1) |
| Verrucomicrobiota (152) | - | Spartobacteria_genera_incertae_sedis (98) |
| - | *Akkermansia* (2) |
| - | *Terrimicrobium* (1) |
| Abditibacteriota (79) | - | *Abditibacterium* (79) |
| Candidatus Saccharibacteria (63) | - | Saccharibacteria_genera_incertae_sedis (63) |
| Thermomicrobiota (41) | - | *Sphaerobacter* (4) |
| - | *Nitrolancea* (2) |
| Nitrospirota (17) | - | *Nitrospira* (16) |
| Cyanobacteria (6) | - | - |
| Spirochaetota (6) | - | *Treponema* (3) |
| Parcubacteria (4) | - | Parcubacteria_genera_incertae_sedis (4) |
| Rhodothermota (2) | - | *Rubrivirga* (1) |
| Microgenomates (1) | - | Microgenomates_genera_incertae_sedis (1) |
| Unclassified Bacteria (2717) | - | - |

**Table S33.** Taxonomic classification of such metagenomic reads from the lake-water sample that corresponded to bacterial or archaeal 16S rRNA gene sequences.

| **Phylum (no. of 16S reads ascribed to the phylum)** | **Class** | **Genus (no. of 16S reads ascribed to the genus)** |
| --- | --- | --- |
| **Archaea (total reads: 131)** | | |
| Euryarchaeota (122) | - | *Methanothrix* (46) |
| - | *Methanoregula* (35) |
| - | *Methanobacterium* (5) |
| - | *Methanosarcina* (2) |
| - | *Methanospirillum* (2) |
| - | *Methanolinea* (1) |
| Thermoproteota (6) | - | - |
| Pacearchaeota (3) | - | Pacearchaeota Incertae Sedis AR13 (625) |
| **Bacteria (total reads: 35992)** | | |
| Cyanobacteria / Cyanobacteriota (9505) | - | *Cyanobium* (3295) |
| - | *Synechococcus* (690) |
| - | *Bacillariophyta* (561) |
| - | *Prochlorococcus* (311) |
| - | *Chlorophyta* (93) |
| - | *Cryptomonadaceae* (29) |
| - | *Planktothrix* (6) |
| - | *Romeriopsis* (5) |
| - | *Pseudanabaena* (4) |
| - | *Streptophyta* (2) |
| - | *Apatinema* (1) |
| Actinobacteria / Actinomycetota (8581) | - | *Rhodoluna* (219) |
| - | *Microcella* (97) |
| - | *Mycobacterium* (69) |
| - | *Aquiluna* (66) |
| - | *Desertimonas* (40) |
| - | *Ilumatobacter* (25) |
| - | *Pontimonas* (21) |
| - | *Agrococcus* (10) |
| - | *Rhabdothermincola* (5) |
| - | *Anaerosoma* (2) |
| - | *Puzihella* (1) |
| - | *Marinisubtilis* (1) |
| - | *Aquipuribacter* (1) |
| - | *Arthrobacter* (1) |
| - | *Gaiella* (1) |
| Planctomycetota (3994) | - | *Posidoniimonas* (68) |
| - | *Aureliella* (17) |
| - | *Botrimarina* (8) |
| - | *Bremerella* (2) |
| - | *Mariniblastus* (2) |
| - | *Rubripirellula* (2) |
| - | *Bythopirellula* (2) |
| - | *Lacipirellula* (2) |
| - | *Fuerstiella* (2) |
| - | *Novipirellula* (1) |
| - | *Schlesneria* (1) |
| Proteobacteria / Pseudomonadota (3893) | Betaproteobacteria (1664) | *Limnohabitans* (86) |
| *Hydrogenophaga* (85) |
| *Methylotenera* (41) |
| *Thiobacillus* (40) |
| *Variovorax* (27) |
| *Polynucleobacter* (27) |
| *Rhodoferax* (24) |
| *Piscinibacter* (21) |
| *Methylophilus* (17) |
| *Bordetella* (17) |
| *Orrella* (16) |
| *Acidovorax* (12) |
| *Propionivibrio* (10) |
| *Rubrivivax* (9) |
| *Sulfurimicrobium* (7) |
| *Serpentinimonas* (7) |
| *Sulfurisoma* (6) |
| *Usitatibacter* (6) |
| *Rhizobacter* (6) |
| *Polaromonas* (5) |
| *Achromobacter* (4) |
| *Roseateles* (3) |
| *Methyloversatilis* (2) |
| *Gallionella* (2) |
| *Malikia* (2) |
| *Curvibacter* (2) |
| *Formosimonas* (2) |
| *Herminiimonas* (2) |
| *Dechloromonas* (2) |
| *Methylovorus* (1) |
| *Sideroxydans* (1) |
| *Aquabacterium* (1) |
| *Limnobacter* (1) |
| *Rhodocyclus* (1) |
| Alphaproteobacteria (1162) | *Roseomonas* (134) |
| *Cypionkella* (62) |
| *Roseococcus* (46) |
| *Sphingorhabdus* (33) |
| *Tabrizicola* (24) |
| *Sandarakinorhabdus* (13) |
| *Erythrobacter* (13) |
| *Cereibacter* (12) |
| *Brevundimonas* (10) |
| *Pseudorhodobacter* (7) |
| *Hyphomicrobium* (7) |
| *Gemmobacter* (6) |
| *Bosea* (6) |
| *Aestuariivirga* (6) |
| *Flavimaricola* (5) |
| *Rhodoblastus* (5) |
| *Aurantiacibacter* (5) |
| *Hyphomonas* (5) |
| *Amaricoccus* (4) |
| *Octadecabacter* (3) |
| *Rhizobium* (3) |
| *Novosphingobium* (3) |
| *Devosia* (2) |
| *Xanthobacter* (2) |
| *Rhabdaerophilum* (2) |
| *Altererythrobacter* (2) |
| *Caulobacter* (2) |
| *Paracoccus* (1) |
| *Fuscovulum* (1) |
| *Hoeflea* (1) |
| *Ciceribacter* (1) |
| *Agrobacterium* (1) |
| *Methylocystis* (1) |
| *Pedomicrobium* (1) |
| *Sphingomonas* (1) |
| *Chioneia* (1) |
| *Polymorphobacter* (1) |
| *Alteraurantiacibacter* (1) |
| *Qipengyuania* (1) |
| *Muricoccus* (1) |
| *Vitreimonas* (1) |
| *Aquidulcibacter* (1) |
| Gammaproteobacteria (685) | *Halomonas* (95) |
| *Legionella* (81) |
| *Vibrio* (74) |
| *Thiocapsa* (17) |
| *Pseudomonas* (12) |
| *Cobetia* (12) |
| *Methylomonas* (11) |
| *Aeromonas* (10) |
| *Rheinheimera* (8) |
| *Escherichia*/Shigella (6) |
| *Thiothrix* (6) |
| *Methylobacter* (5) |
| *Thiovirga* (5) |
| *Shewanella* (5) |
| *Halopseudomonas* (4) |
| *Povalibacter* (4) |
| *Stenotrophomonas* (4) |
| *Alishewanella* (4) |
| *Cellvibrio* (4) |
| *Acinetobacter* (3) |
| *Steroidobacter* (3) |
| *Pseudohongiella* (3) |
| *Arenimonas* (3) |
| *Thiobaca* (3) |
| *Methylovulum* (2) |
| *Aquicella* (2) |
| *Motilimonas* (2) |
| *Aquirhabdus* (1) |
| *Methylotuvimicrobium* (1) |
| *Salmonella* (1) |
| *Enterobacter* (1) |
| *Yersinia* (1) |
| *Thiolinea* (1) |
| Deltaproteobacteria (263) | *Desulfomonile* (39) |
| *Desulfobulbus* (14) |
| *Syntrophorhabdus* (10) |
| *Desulfocapsa* (7) |
| *Syntrophobacter* (4) |
| *Desulfatirhabdium* (3) |
| *Smithella* (3) |
| *Desulfocastanea* (2) |
| *Desulfopila* (2) |
| *Desulfofaba* (2) |
| *Syntrophus* (2) |
| *Aetherobacter* (2) |
| *Desulfovibrio* (2) |
| *Geobacter* (1) |
| *Geotalea* (1) |
| *Geomesophilobacter* (1) |
| *Desulforhopalus* (1) |
| *Syntrophobacterium* (1) |
| *Fundidesulfovibrio* (1) |
| *Humidesulfovibrio* (1) |
| *Solidesulfovibrio* (1) |
| Oligoflexia (8) | *Peredibacter* (3) |
| *Silvanigrella* (1) |
| Bacteroidetes / Bacteroidota (3771) | - | *Algoriphagus* (928) |
| - | *Fluviicola* (138) |
| - | *Flavobacterium* (92) |
| - | *Segatella* (66) |
| - | *Bacteroides* (48) |
| - | *Salinirepens* (42) |
| - | *Haliscomenobacter* (35) |
| - | *Daejeonella* (27) |
| - | *Aquirufa* (22) |
| - | *Lacihabitans* (14) |
| - | *Paludibacter* (12) |
| - | *Flavitalea* (9) |
| - | *Arcicella* (8) |
| - | *Saprospira* (5) |
| - | *Aquipluma* (5) |
| - | *Lentimicrobium* (5) |
| - | *Emticicia* (4) |
| - | *Phnomibacter* (4) |
| - | *Sediminibacterium* (4) |
| - | *Lacibacter* (4) |
| - | *Polaribacter* (3) |
| - | *Brumimicrobium* (2) |
| - | *Maribacter* (2) |
| - | *Lewinella* (2) |
| - | *Aurantisolimonas* (2) |
| - | *Paraflavitalea* (2) |
| - | *Cognataquiflexum* (1) |
| - | *Rhodonellum* (1) |
| - | *Sandaracinomonas* (1) |
| - | *Lutibacter* (1) |
| - | *Actibacter* (1) |
| - | *Leyella* (1) |
| - | *Parabacteroides* (1) |
| - | *Alistipes* (1) |
| Verrucomicrobiota (1560) | - | Spartobacteria_genera_incertae_sedis (621) |
| - | *Luteolibacter* (182) |
| - | *Terrimicrobium* (147) |
| - | Subdivision3_genera_incertae_sedis (15) |
| - | *Roseibacillus* (6) |
| - | *Pelagicoccus* (4) |
| - | *Phragmitibacter* (2) |
| - | *Oleiharenicola* (2) |
| - | *Lacunisphaera* (2) |
| - | Subdivision5_genera_incertae_sedis (1) |
| Campylobacterota (760) | - | *Sulfuricurvum* (490) |
| - | *Sulfurimonas* (165) |
| - | *Sulfurovum* (14) |
| - | *Arcobacter* (8) |
| Firmicutes / Bacillota (205) | - | *Propionispira* (34) |
| - | *Faecalibacterium* (10) |
| - | *Lactobacillus* (6) |
| - | *Saccharofermentans* (6) |
| - | *Desulfosporosinus* (6) |
| - | *Halalkalibacterium* (5) |
| - | *Pelosinus* (4) |
| - | Clostridium sensu stricto (3) |
| - | *Enterococcus* (2) |
| - | *Aerococcus* (2) |
| - | *Dysosmobacter* (2) |
| - | *Lachnotalea* (2) |
| - | *Syntrophomonas* (2) |
| - | *Mitsuokella* (2) |
| - | *Anaerovibrio* (2) |
| - | *Granulicatella* (1) |
| - | *Ercella* (1) |
| - | *Gemmiger* (1) |
| - | *Desulfofarcimen* (1) |
| - | *Cryptanaerobacter* (1) |
| - | *Propionispora* (1) |
| - | *Dialister* (1) |
| Spirochaetota (37) | - | *Rectinema* (13) |
| - | *Treponema* (10) |
| - | *Teretinema* (2) |
| Gemmatimonadota (35) | - | *Gemmatimonas* (28) |
| Parcubacteria (34) | - | Parcubacteria_genera_incertae_sedis (34) |
| Acidobacteriota (29) | - | Gp6 (6) |
| - | Gp7 (3) |
| - | Gp16 (3) |
| - | Gp17 (2) |
| - | *Stenotrophobacter* (1) |
| - | *Luteitalea* (1) |
| Chloroflexi / Chloroflexota (27) | - | *Caldilinea* (2) |
| - | *Roseiflexus* (1) |
| Candidatus Saccharibacteria (25) | - | Saccharibacteria_genera_incertae_sedis (25) |
| Aquificota (20) | - | *Hydrogenobacter* (20) |
| Chlamydiota (10) | - | *Neochlamydia* (3) |
| - | *Parachlamydia* (2) |
| Microgenomates (9) | - | Microgenomates_genera_incertae_sedis (9) |
| Armatimonadetes / Armatimonadota (7) | - | Armatimonadetes_gp2 (3) |
| Fusobacteriota (6) | - | *Fusobacterium* (2) |
| Lentisphaerota (6) | - | *Victivallis* (2) |
| Deinococcus-Thermus / Deinococcota (2) | - | - |
| Balneolota (1) | - | - |
| Elusimicrobiota (1) | - | *Endomicrobium* (1) |
| Fibrobacterota (1) | - | *Chitinivibrio* (1) |
| Latescibacteria (1) | - | Latescibacteria_genera_incertae_sedis (1) |
| SR1 (1) | - | SR1_genera_incertae_sedis (1) |
| Thermodesulfobacteriota (1) | - | - |
| Unclassified Bacteria (3470) | - | - |

**Table S34.** Taxonomic classification of such metagenomic reads from the lake-sediment sample that corresponded to bacterial or archaeal 16S rRNA gene sequences.

| **Phylum (no. of 16S reads ascribed to the phylum)** | **Class** | **Genus (no. of 16S reads ascribed to the genus)** |
| --- | --- | --- |
| **Archaea (total reads: 1054)** | | |
| Euryarchaeota (837) | - | *Methanothrix* (507) |
| - | *Methanoregula* (85) |
| - | *Methanosarcina* (61) |
| - | *Methanocella* (23) |
| - | *Methanomassiliicoccus* (17) |
| - | *Methanospirillum* (9) |
| - | *Methanobacterium* (9) |
| - | *Methanolobus* (6) |
| - | *Methanolinea* (4) |
| - | *Methanomethylovorans* (3) |
| - | *Methanosphaera* (2) |
| Nitrososphaerota (174) | - | *Nitrososphaera* (167) |
| Pacearchaeota (22) | - | Pacearchaeota Incertae Sedis AR13 (22) |
| Diapherotrites (1) | - | - |
| Thermoproteota (1) | - | - |
| Woesearchaeota (1) | - | - |
| Unclassified Archaea (18) | - |  |
| **Bacteria (total reads: 33274)** | | |
| Proteobacteria / Pseudomonadota (14752) | Betaproteobacteria (10319) | *Methylotenera* (1785) |
| *Hydrogenophaga* (1042) |
| *Rhodoferax* (504) |
| *Methylophilus* (311) |
| *Sideroxydans* (132) |
| *Thiobacillus* (126) |
| *Acidovorax* (76) |
| *Ferrigenium* (65) |
| *Malikia* (57) |
| *Gallionella* (56) |
| *Serpentinimonas* (46) |
| *Simplicispira* (35) |
| *Polaromonas* (26) |
| *Variovorax* (24) |
| *Albidiferax* (22) |
| *Roseateles* (19) |
| *Rubrivivax* (18) |
| *Curvibacter* (17) |
| *Pseudorhodoferax* (16) |
| *Limnohabitans* (14) |
| *Methyloradius* (12) |
| *Uliginosibacterium* (10) |
| *Propionivibrio* (9) |
| *Sulfurisoma* (6) |
| *Methyloversatilis* (6) |
| *Ferribacterium* (6) |
| Deichloromonas (6) |
| *Sideroxyarcus* (5) |
| *Georgfuchsia* (5) |
| *Giesbergeria* (4) |
| *Sulfuritalea* (4) |
| *Comamonas* (3) |
| *Methylobacillus* (3) |
| *Sulfurimicrobium* (3) |
| *Aquabacterium* (2) |
| *Ramlibacter* (2) |
| *Pigmentiphaga* (2) |
| *Xenophilus* (1) |
| *Piscinibacter* (1) |
| *Pulveribacter* (1) |
| *Noviherbaspirillum* (1) |
| *Ferriphaselus* (1) |
| *Methylovorus* (1) |
| *Denitratisoma* (1) |
| *Annwoodia* (1) |
| *Parasulfuritortus* (1) |
| *Azonexus* (1) |
| Deltaproteobacteria (1994) | *Syntrophus* (119) |
| *Smithella* (104) |
| *Humidesulfovibrio* (100) |
| *Syntrophorhabdus* (94) |
| *Desulfuromonas* (45) |
| *Geomonas* (37) |
| *Geobacter* (36) |
| *Geomesophilobacter* (31) |
| *Oryzomonas* (29) |
| *Desulfatiglans* (17) |
| *Desulfobulbus* (12) |
| *Pelotalea* (8) |
| *Syntrophotalea* (4) |
| *Syntrophobacter* (3) |
| *Desulfocastanea* (3) |
| *Desulfomonile* (2) |
| *Solidesulfovibrio* (2) |
| *Labilithrix* (2) |
| *Geoanaerobacter* (1) |
| *Geomobilimonas* (1) |
| *Desulfovirga* (1) |
| *Desulfacinum* (1) |
| *Desulfomicrobium* (1) |
| *Cystobacter* (1) |
| *Corallococcus* (1) |
| *Minicystis* (1) |
| *Desulforegula* (1) |
| *Desulfatirhabdium* (1) |
| *Desulfurivibrio* (1) |
| Gammaproteobacteria (1418) | *Rheinheimera* (368) |
| *Pseudomonas* (220) |
| *Aeromonas* (37) |
| *Thiovirga* (20) |
| *Alkalimonas* (20) |
| *Arenimonas* (11) |
| *Pseudohongiella* (7) |
| *Alishewanella* (6) |
| *Cobetia* (5) |
| *Povalibacter* (5) |
| *Pseudoalteromonas* (4) |
| *Shewanella* (4) |
| *Aquirhabdus* (3) |
| *Methylobacter* (3) |
| *Pseudoxanthomonas* (3) |
| *Cavicella* (2) |
| *Psychrobacter* (2) |
| *Thiobaca* (2) |
| *Thiocapsa* (2) |
| *Methylicorpusculum* (2) |
| *Nitrincola* (2) |
| *Sulfuricaulis* (2) |
| *Vibrio* (2) |
| *Thiothrix* (2) |
| *Denitrificimonas* (1) |
| *Arsukibacterium* (1) |
| *Acidibacter* (1) |
| *Methylomonas* (1) |
| *Steroidobacter* (1) |
| Alphaproteobacteria (727) | *Devosia* (59) |
| *Brevundimonas* (33) |
| *Tabrizicola* (27) |
| *Pedomicrobium* (13) |
| *Rhizomicrobium* (13) |
| *Sphingorhabdus* (12) |
| *Hyphomicrobium* (10) |
| *Pseudorhodobacter* (10) |
| *Methyloceanibacter* (9) |
| *Agrobacterium* (9) |
| *Sphingomonas* (9) |
| *Hyphomonas* (9) |
| *Emcibacter* (9) |
| *Microvirga* (7) |
| *Paracoccus* (7) |
| *Magnetospirillum* (7) |
| *Magnetovibrio* (7) |
| *Blastomonas* (6) |
| *Caulobacter* (5) |
| *Erythrobacter* (4) |
| *Variibacter* (3) |
| *Gemmobacter* (3) |
| *Pararhizobium* (2) |
| *Neorhizobium* (2) |
| *Hoeflea* (2) |
| *Pseudorhizobium* (2) |
| *Mesorhizobium* (2) |
| *Pseudorhodoplanes* (2) |
| *Rhodoplanes* (2) |
| *Pseudolabrys* (2) |
| *Methylobacterium* (2) |
| *Chthonobacter* (2) |
| *Polymorphobacter* (2) |
| *Rhodobacter* (2) |
| *Roseomonas* (2) |
| *Bauldia* (1) |
| *Ensifer* (1) |
| *Undibacter* (1) |
| *Methylosinus* (1) |
| *Aestuariivirga* (1) |
| *Sandarakinorhabdus* (1) |
| *Novosphingobium* (1) |
| *Alteraurantiacibacter* (1) |
| *Altererythrobacter* (1) |
| *Phenylobacterium* (1) |
| *Cypionkella* (1) |
| *Craurococcus* (1) |
| Oligoflexia (29) | *Bacteriovorax* (15) |
| *Peredibacter* (6) |
| Campylobacterota (4247) | - | *Sulfuricurvum* (3060) |
| - | *Sulfurimonas* (347) |
| - | *Arcobacter* (202) |
| - | *Sulfurospirillum* (43) |
| - | *Sulfurovum* (16) |
| - | *Helicobacter* (1) |
| Bacteroidetes / Bacteroidota (3471) | - | *Flavobacterium* (709) |
| - | *Algoriphagus* (52) |
| - | *Paludibacter* (51) |
| - | *Lutibacter* (51) |
| - | *Aquipluma* (37) |
| - | *Polaribacter* (23) |
| - | *Lentimicrobium* (14) |
| - | *Bacteroides* (12) |
| - | *Lacihabitans* (12) |
| - | *Sediminibacterium* (11) |
| - | *Fluviicola* (8) |
| - | *Roseimarinus* (7) |
| - | *Cognataquiflexum* (6) |
| - | *Puteibacter* (4) |
| - | *Alistipes* (4) |
| - | *Kordia* (4) |
| - | *Chryseotalea* (4) |
| - | *Subsaxibacter* (3) |
| - | *Phnomibacter* (3) |
| - | *Ferruginibacter* (3) |
| - | *Gillisia* (2) |
| - | *Daejeonella* (2) |
| - | *Mariniphaga* (1) |
| - | *Maribellus* (1) |
| - | *Sunxiuqinia* (1) |
| - | *Breznakibacter* (1) |
| - | *Tenuifilum* (1) |
| - | *Williamwhitmania* (1) |
| - | *Actibacter* (1) |
| - | *Namhaeicola* (1) |
| - | *Tenacibaculum* (1) |
| - | *Aurantivirga* (1) |
| - | *Aurantisolimonas* (1) |
| - | *Sporocytophaga* (1) |
| - | *Saprospira* (1) |
| Firmicutes / Bacillota (2693) | - | Clostridium sensu stricto (265) |
| - | *Romboutsia* (172) |
| - | *Turicibacter* (66) |
| - | *Youngiibacter* (65) |
| - | *Gracilibacter* (37) |
| - | *Proteiniclasticum* (23) |
| - | *Ruminiclostridium* (19) |
| - | *Anaerosporomusa* (19) |
| - | *Pelosinus* (19) |
| - | *Ercella* (17) |
| - | *Domibacillus* (17) |
| - | *Tissierella* (16) |
| - | *Desulfosporosinus* (15) |
| - | *Niallia* (12) |
| - | *Sporosarcina* (11) |
| - | *Hydrogenispora* (10) |
| - | *Acetivibrio* (9) |
| - | *Saccharofermentans* (8) |
| - | *Cellulosilyticum* (7) |
| - | *Acetobacterium* (7) |
| - | *Sporomusa* (7) |
| - | *Pseudobacteroides* (6) |
| - | *Oxobacter* (6) |
| - | *Paenibacillus* (6) |
| - | *Mobilitalea* (5) |
| - | *Guopingia* (5) |
| - | *Syntrophomonas* (5) |
| - | *Anaerobacillus* (5) |
| - | *Sporobacter* (4) |
| - | *Lactobacillus* (4) |
| - | *Desulfosporomusa* (4) |
| - | *Terrisporobacter* (3) |
| - | *Ruminococcus* (2) |
| - | *Anaerobacterium* (2) |
| - | *Blautia* (2) |
| - | *Anaerotaenia* (2) |
| - | *Lacrimispora* (2) |
| - | *Anaerocolumna* (2) |
| - | *Variimorphobacter* (2) |
| - | *Aminipila* (2) |
| - | *Fusibacter* (2) |
| - | *Cohnella* (2) |
| - | *Peribacillus* (2) |
| - | *Anaerosinus* (2) |
| - | *Oscillibacter* (1) |
| - | *Ruminococcoides* (1) |
| - | *Lawsonibacter* (1) |
| - | *Haloimpatiens* (1) |
| - | *Desnuesiella* (1) |
| - | *Intestinibacter* (1) |
| - | *Pelotomaculum* (1) |
| - | *Dehalobacter* (1) |
| - | *Phosphitispora* (1) |
| - | *Enterocloster* (1) |
| - | *Zhenhengia* (1) |
| - | *Caecibacterium* (1) |
| - | *Roseburia* (1) |
| - | *Agathobacter* (1) |
| - | *Halalkalibacter* (1) |
| - | *Lederbergia* (1) |
| - | *Oceanobacillus* (1) |
| - | *Robertmurraya* (1) |
| - | *Metabacillus* (1) |
| - | *Psychrobacillus* (1) |
| - | *Erysipelothrix* (1) |
| Chloroflexi / Chloroflexota (1709) | - | *Leptolinea* (125) |
| - | *Pelolinea* (29) |
| - | *Levilinea* (27) |
| - | *Anaerolinea* (25) |
| - | *Aggregatilinea* (24) |
| - | *Thermanaerothrix* (17) |
| - | *Litorilinea* (5) |
| - | *Bellilinea* (3) |
| - | *Ornatilinea* (3) |
| - | *Longilinea* (2) |
| - | *Dehalogenimonas* (2) |
| Actinobacteria / Actinomycetota (1491) | - | *Anaerosoma* (124) |
| - | *Gaiella* (66) |
| - | *Streptomyces* (64) |
| - | *Actinotalea* (48) |
| - | *Demequina* (24) |
| - | *Pseudonocardia* (20) |
| - | *Blastococcus* (20) |
| - | *Arthrobacter* (17) |
| - | *Micromonospora* (17) |
| - | *Solirubrobacter* (13) |
| - | *Mycobacterium* (11) |
| - | *Rubrobacter* (9) |
| - | *Microlunatus* (7) |
| - | *Kitasatospora* (7) |
| - | *Ilumatobacter* (7) |
| - | *Modestobacter* (6) |
| - | *Aeromicrobium* (5) |
| - | *Actinocorallia* (4) |
| - | *Actinomycetospora* (4) |
| - | *Corynebacterium* (4) |
| - | *Parviterribacter* (4) |
| - | *Baekduia* (4) |
| - | *Miltoncostaea* (4) |
| - | *Rhabdothermincola* (4) |
| - | *Nocardioides* (3) |
| - | *Mumia* (3) |
| - | *Isoptericola* (3) |
| - | *Desertimonas* (3) |
| - | *Brevibacterium* (2) |
| - | *Rhodococcus* (2) |
| - | *Conexibacter* (2) |
| - | *Fannyhessea* (2) |
| - | *Euzebya* (2) |
| - | *Marmoricola* (1) |
| - | *Cutibacterium* (1) |
| - | *Nesterenkonia* (1) |
| - | *Paeniglutamicibacter* (1) |
| - | *Pseudarthrobacter* (1) |
| - | *Agrococcus* (1) |
| - | *Actinocatenispora* (1) |
| - | *Planomonospora* (1) |
| - | *Williamsia* (1) |
| - | *Geodermatophilus* (1) |
| - | *Raoultibacter* (1) |
| - | *Actinomarinicola* (1) |
| - | *Egibacter* (1) |
| Acidobacteriota (633) | - | Gp3 (70) |
| - | Gp6 (56) |
| - | Gp17 (55) |
| - | Gp16 (54) |
| - | Gp18 (31) |
| - | Gp7 (24) |
| - | *Thermoanaerobaculum* (9) |
| - | *Geothrix* (7) |
| - | *Luteitalea* (7) |
| - | *Holophaga* (6) |
| - | Gp19 (6) |
| - | *Paludibaculum* (4) |
| - | *Vicinamibacter* (3) |
| - | Gp10 (3) |
| - | Gp4 (2) |
| - | *Stenotrophobacter* (2) |
| - | Gp21 (1) |
| - | Gp23 (1) |
| - | Gp25 (1) |
| Verrucomicrobiota (400) | - | Subdivision3_genera_incertae_sedis (99) |
| - | *Opitutus* (55) |
| - | *Luteolibacter* (11) |
| - | *Nibricoccus* (9) |
| - | *Lacunisphaera* (5) |
| - | *Alterococcus* (5) |
| - | *Oleiharenicola* (4) |
| - | Subdivision5_genera_incertae_sedis (4) |
| Planctomycetota (312) | - | *Anaerohalosphaera* (32) |
| - | *Tepidisphaera* (3) |
| - | *Limihaloglobus* (1) |
| Cyanobacteria / Cyanobacteriota (240) | - | *Bacillariophyta* (204) |
| - | *Streptophyta* (7) |
| - | *Cyanobium* (4) |
| - | *Pseudanabaena* (1) |
| Spirochaetota (237) | - | *Rectinema* (32) |
| - | *Spirochaeta* (14) |
| - | *Gracilinema* (13) |
| - | *Teretinema* (6) |
| - | *Treponema* (3) |
| - | *Breznakiella* (2) |
| - | *Thermospira* (1) |
| Armatimonadetes / Armatimonadota (152) | - | Armatimonadetes_gp2 (128) |
| - | *Fimbriimonas* (2) |
| Microgenomates (70) | - | Microgenomates_genera_incertae_sedis (70) |
| Parcubacteria (63) | - | Parcubacteria_genera_incertae_sedis (63) |
| Aminicenantes (55) | - | *Saccharicenans* (16) |
| BRC1 (44) | - | BRC1_genera_incertae_sedis (44) |
| Chlorobiota (42) | - | *Ignavibacterium* (17) |
| - | *Melioribacter* (6) |
| Latescibacteria (32) | - | Latescibacteria_genera_incertae_sedis (32) |
| Fibrobacterota (19) | - | *Chitinispirillum* (15) |
| - | *Hallerella* (3) |
| Candidatus Saccharibacteria (16) | - | Saccharibacteria_genera_incertae_sedis (16) |
| Gemmatimonadota (14) | - | *Gemmatimonas* (4) |
| Nitrospirota (14) | - | *Dissulfurispira* (10) |
| - | *Nitrospira* (3) |
| Chlamydiota (13) | - | *Neochlamydia* (1) |
| - | *Parachlamydia* (1) |
| Hydrogenedentes (12) | - | *Candidatus* Hydrogenedens (12) |
| SR1 (12) | - | SR1_genera_incertae_sedis (12) |
| Elusimicrobiota (9) | - | *Endomicrobium* (5) |
| - | *Elusimicrobium* (3) |
| Lentisphaerota (7) | - | *Oligosphaera* (5) |
| Cloacimonetes (5) | - | *Candidatus* Cloacamonas (5) |
| Kiritimatiellota (4) | - | *Pontiella* (1) |
| - | *Tichowtungia* (1) |
| Thermomicrobiota (4) | - | - |
| Calditrichota (2) | - | *Caldithrix* (2) |
| Mycoplasmatota (2) | - | *Mariniplasma* (1) |
| Balneolota (1) | - | - |
| Fusobacteriota (1) | - | - |
| Unclassified Bacteria (2496) | - |  |

**Supplementary Figures**

| **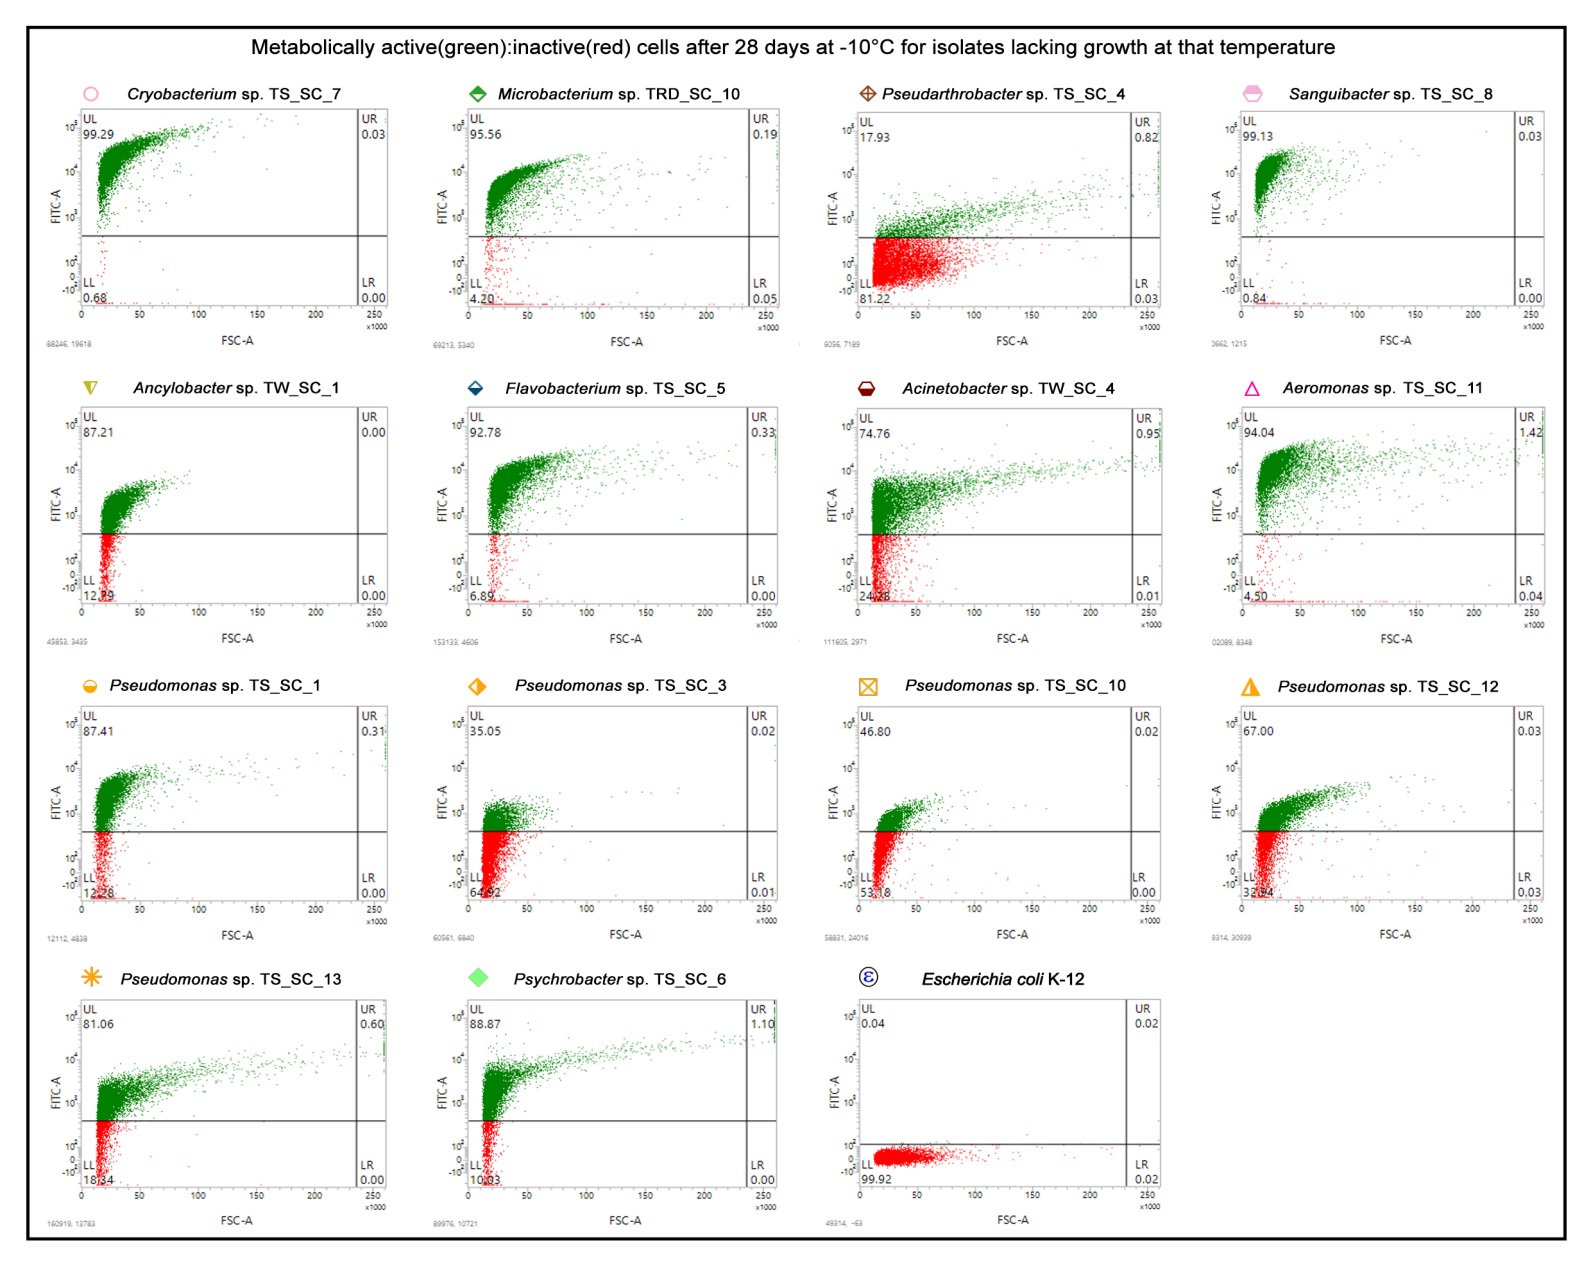** |
| --- |
| **Fig. S1.** Flow cytometry-derived dot plots depicting what proportions of cells were stained by FDA (after 28 days of incubation) in the LB cultures of the 14 TMA isolates incapable of growing at -10°C. In every dot plot, the levels of fluorescence recorded for 10000 randomly chosen cells have been shown as the functions of the corresponding forward scattering data, with green and red points representing FDA stained and unstained cells respectively. Each FACS experiment was repeated two more times, with deviation from the result (percentages of FDA stained and unstained cells) shown here being <2% on every occasion. |

| **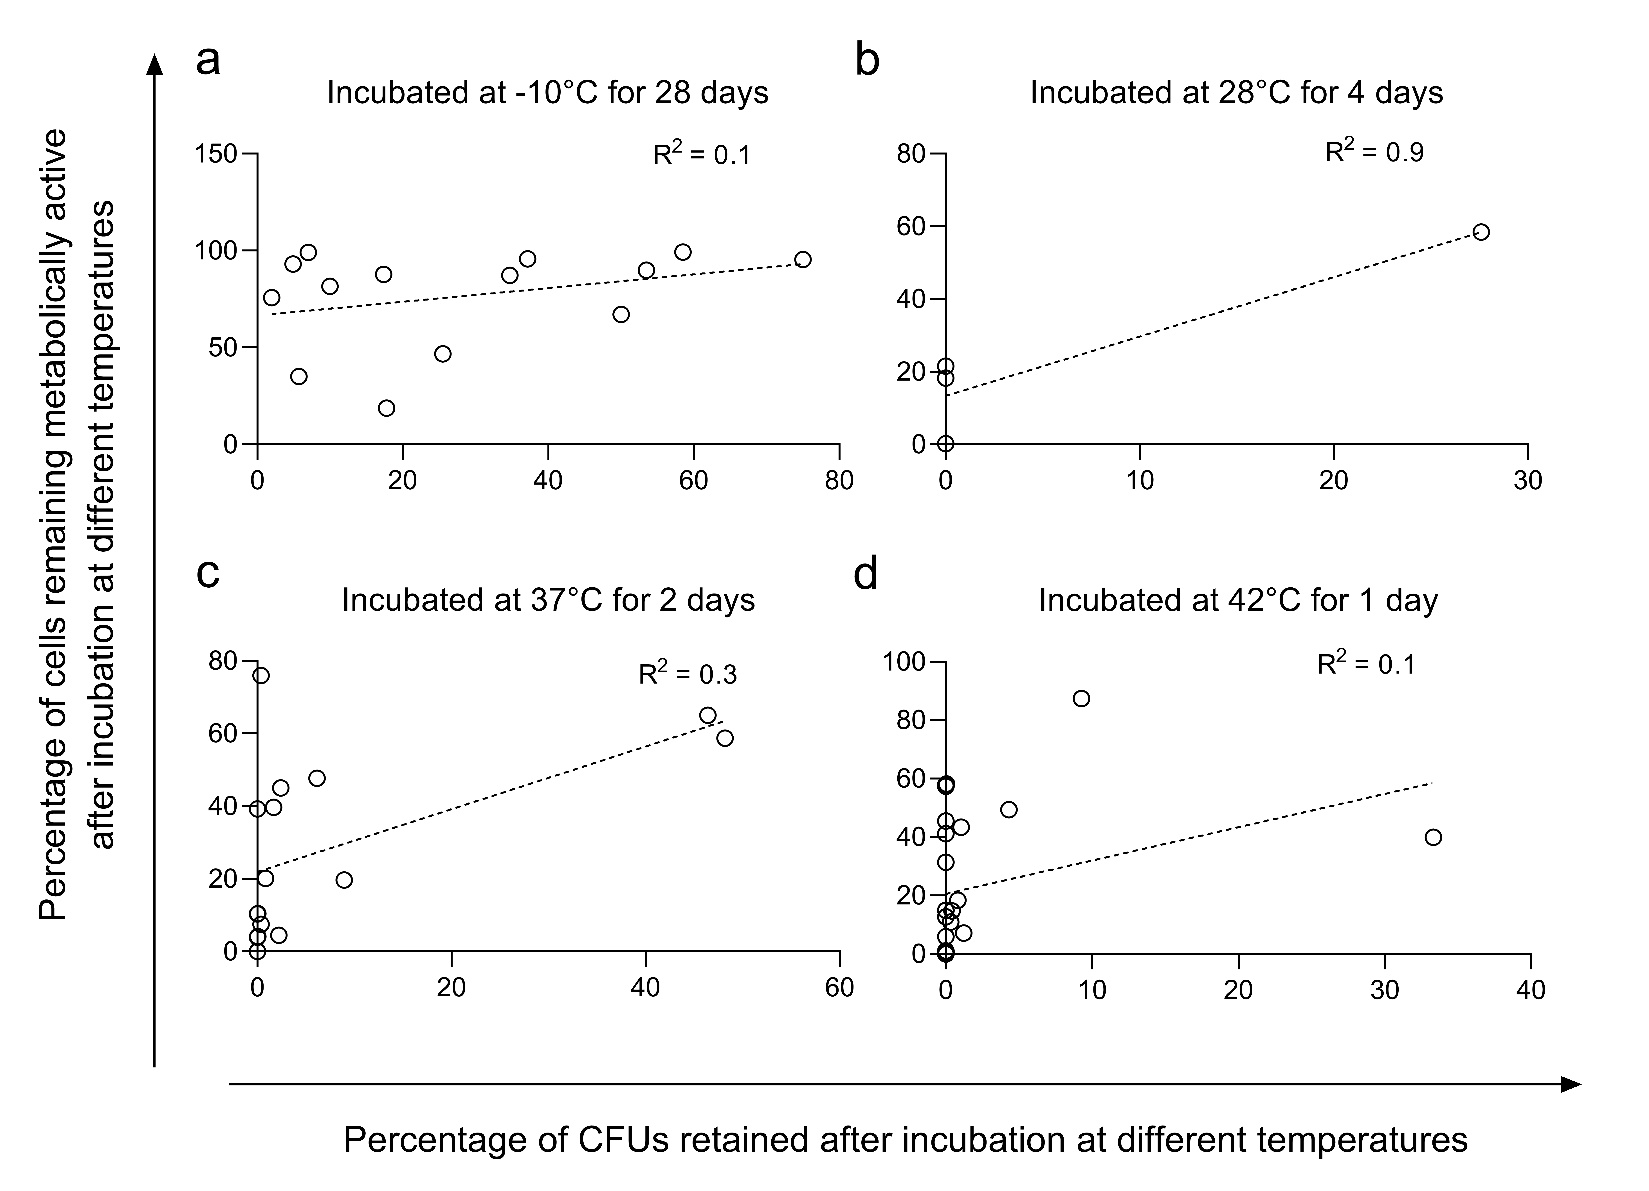** |
| --- |
| **Fig. S2.** Correlation between the proportions of divisible and metabolically-active cells across the species incapable of growing in Luria broth at (**a**) -10°C, (**b**) 28°C, (**c**) 37°C, or (**d**) 42°C. |

| **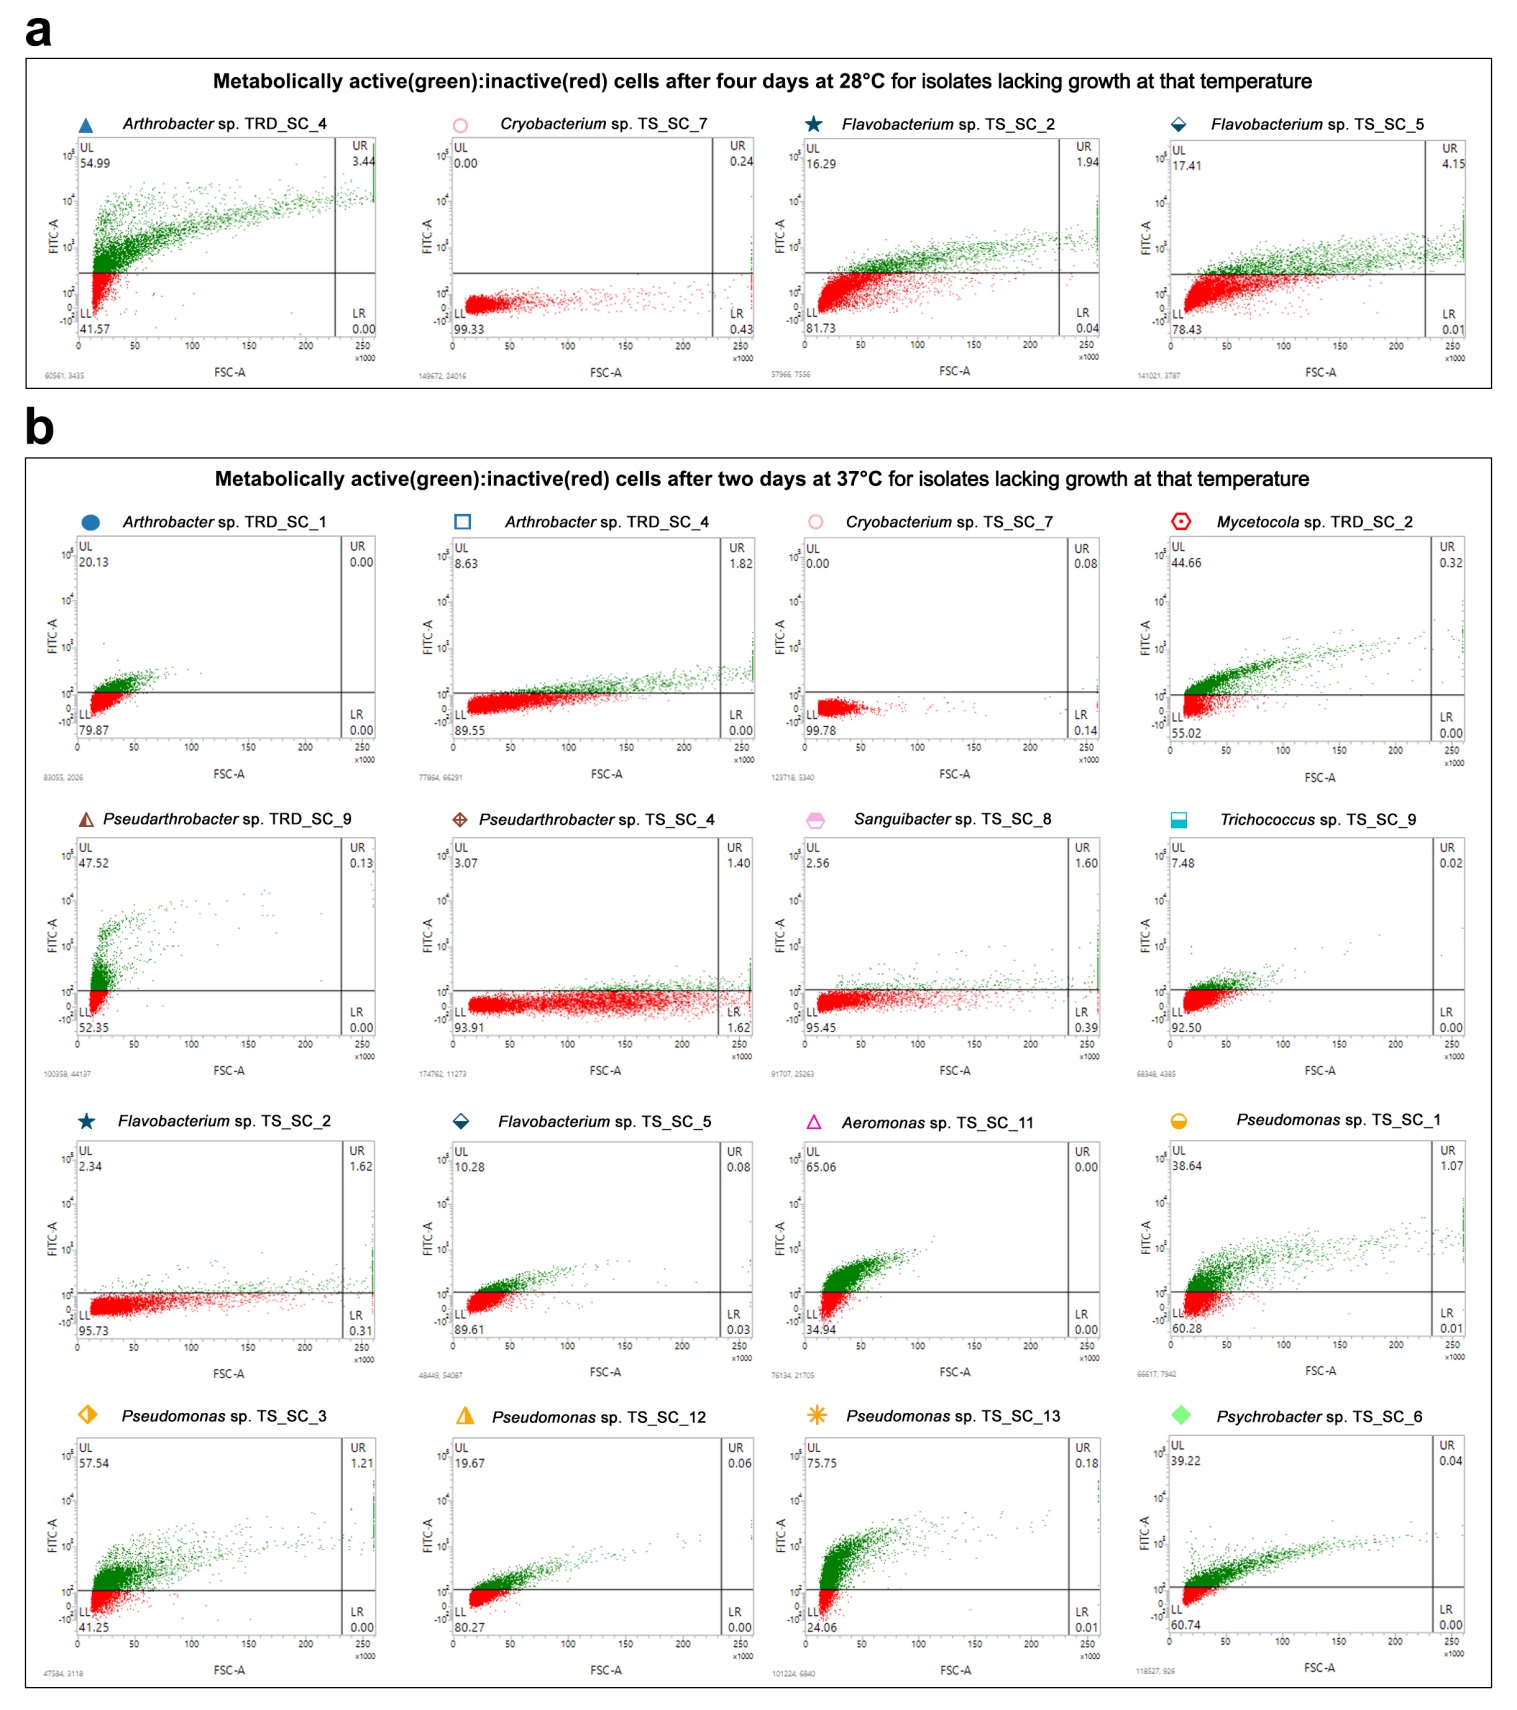** |
| --- |
| **Fig. S3.** Flow cytometry-derived dot plots depicting what proportions of cells were stained by FDA in the LB cultures of the isolates incapable of growing after (**a**) four days of incubation at 28°C, and (**b**) two days of incubation at 37°C. In each dot plot, the fluorescence levels recorded for 10000 randomly chosen cells have been shown as the functions of the corresponding forward scattering data, with green and red points representing FDA stained and unstained cells respectively. Each FACS experiment was repeated two more times, with deviation from the result (percentages of FDA stained and unstained cells) shown here being <2% on every occasion. |
| **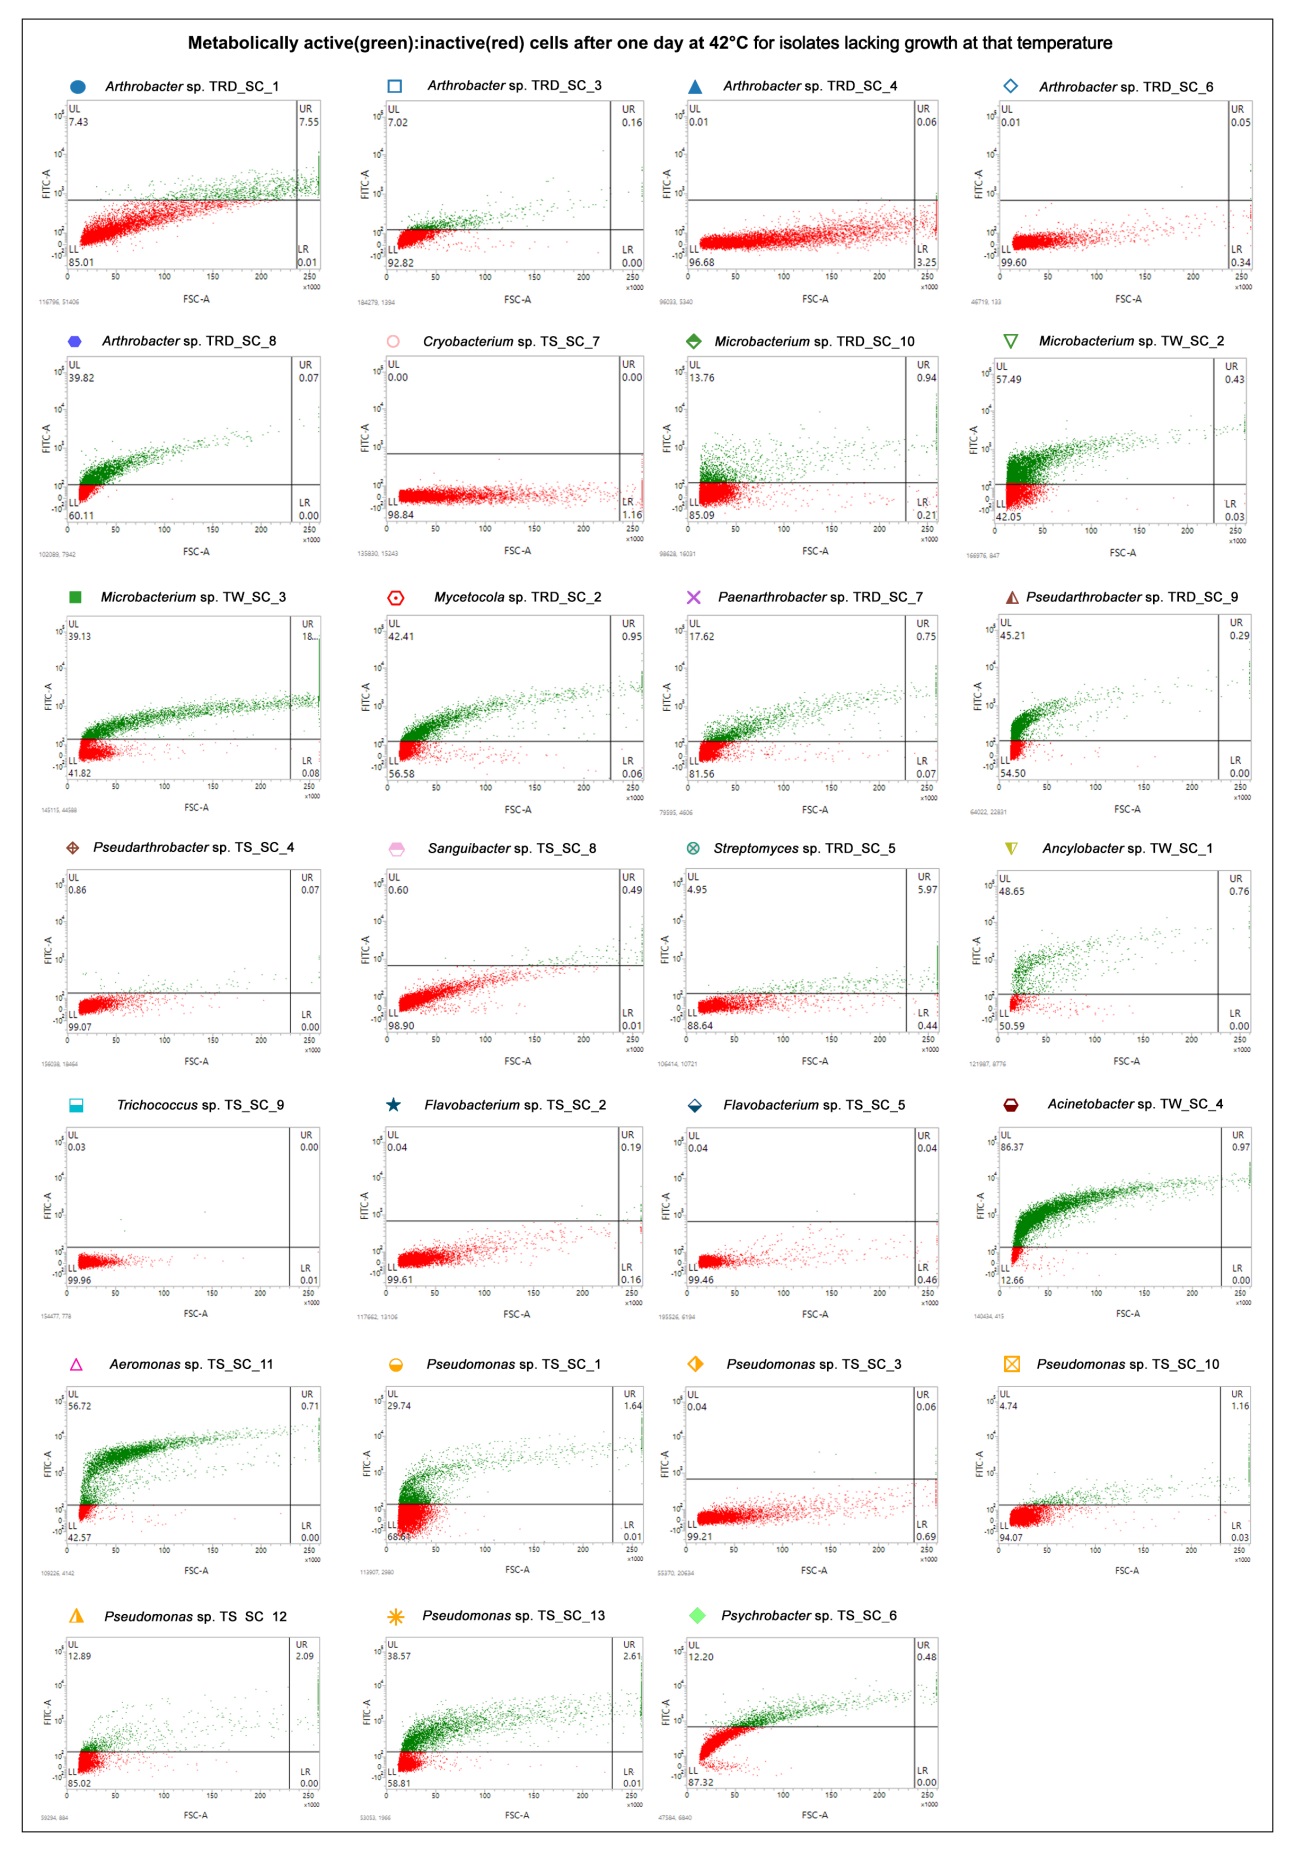** | |
| **Fig. S4.** Flow cytometry-derived dot plots depicting what proportions of cells were stained by FDA in the LB cultures of the 27 TMA isolates after 24 h incubation at 42°C**.** In each plot, the fluorescence levels recorded for 10000 randomly chosen cells have been shown as the functions of the corresponding forward scattering data, with green and red points representing FDA stained and unstained cells respectively. Each FACS experiment was repeated two more times, with deviation from the result (percentages of FDA stained and unstained cells) shown here being <2% on every occasion. | |

| **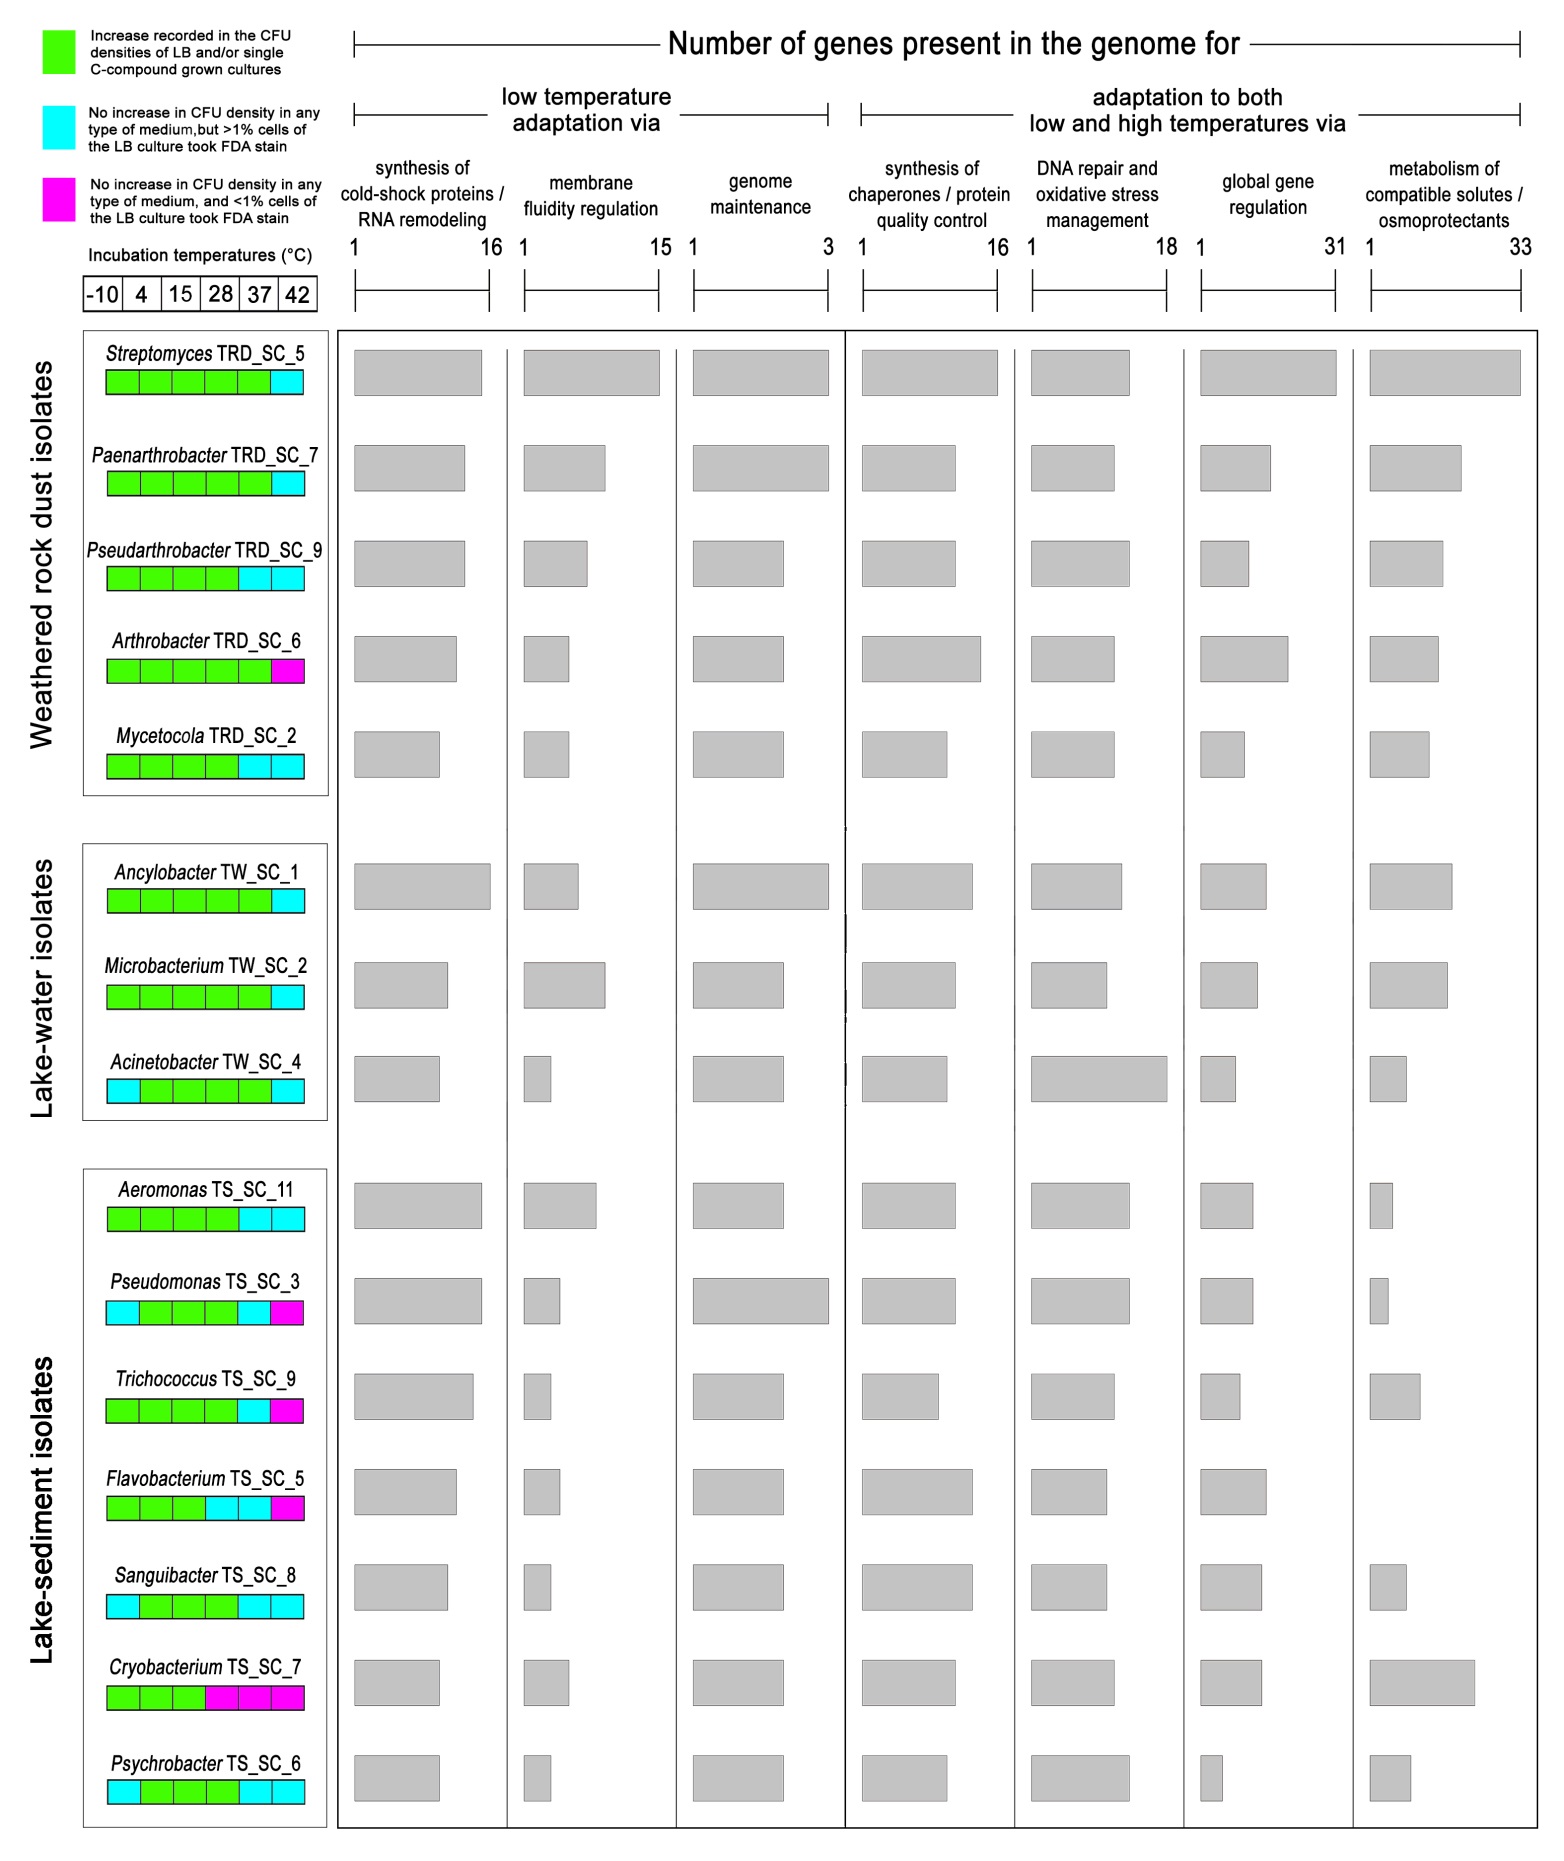** |
| --- |
| **Fig. S5.** Functional-category-wise numeral distribution of genes putatively concerned with low temperature adaptation, and low as well as high temperature adaptation, within the genomes of the 15 TMA isolates selected on a “one per genus” basis. Strains isolated from the weathered rock dust, lake-water, and lake-sediment are clustered in separate boxes. Below each isolate name, a box panel indicating the organism’s growth/survival phenotype at the six incubation temperatures tested has been given (the color code that has been used to fill the boxes is given at the upper left corner of the figure). |

| 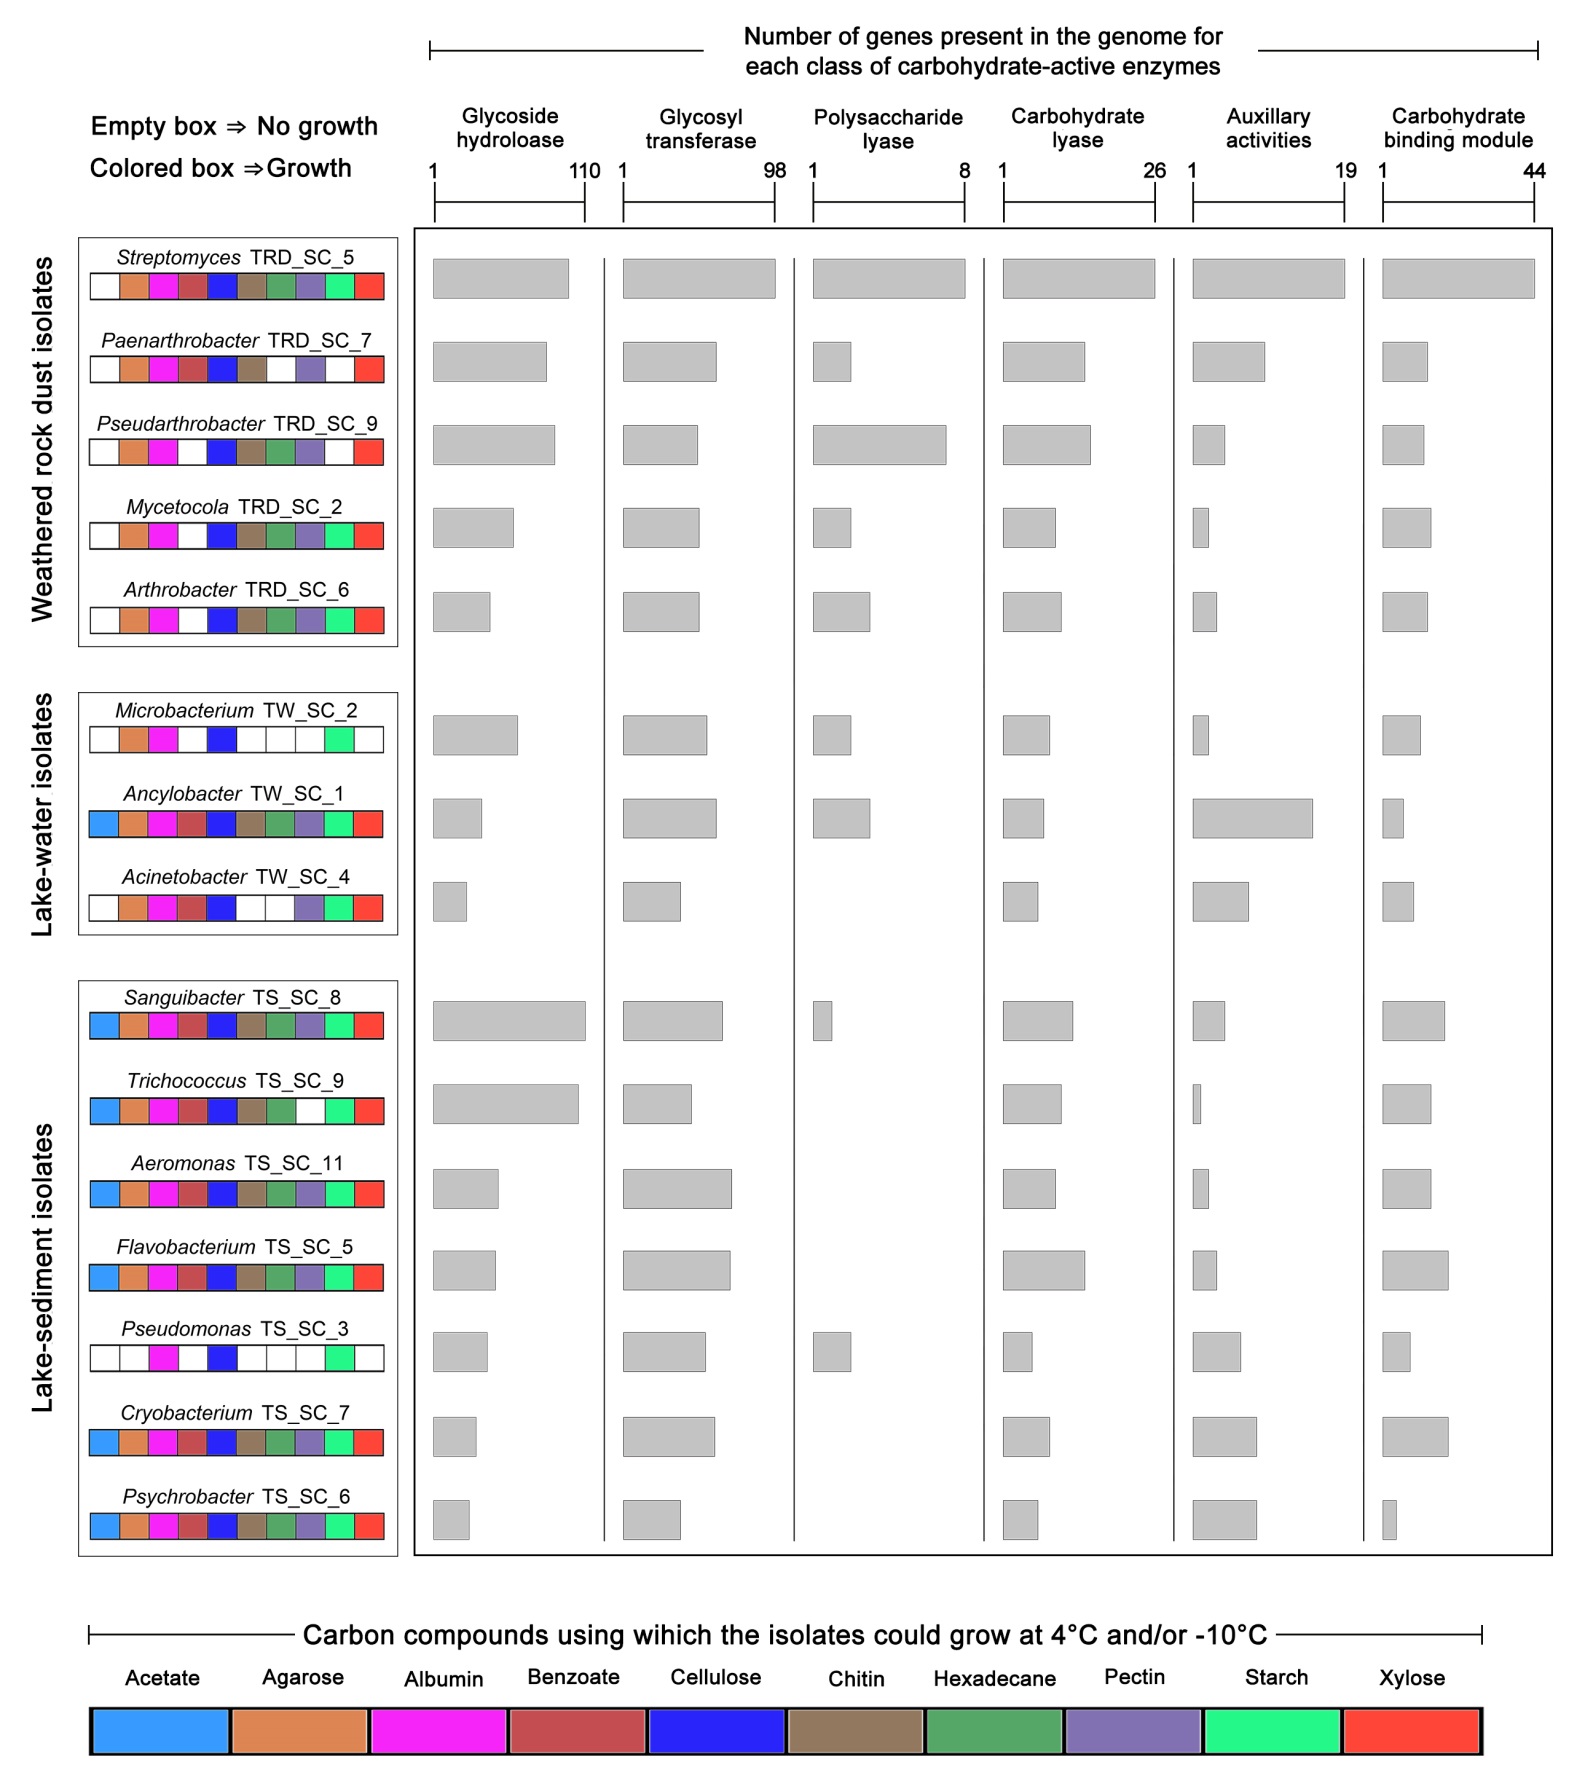 |
| --- |
| **Fig. S6.** Functional-category-wise numeral distribution of genes putatively concerned with carbohydrate metabolism (encoding the different categories of carbohydrate-active enzymes), within the genomes of the 15 TMA isolates selected on a “one per genus” basis. Strains isolated from the weathered rock dust, lake-water, and lake-sediment are clustered in separate boxes. Below each isolate name, a box panel indicating the organism’s ability to grow using different carbon compounds (at 4°C and/or -10°C) has been given (the color code that has been used to fill the boxes is given at the bottom of the figure). |

| **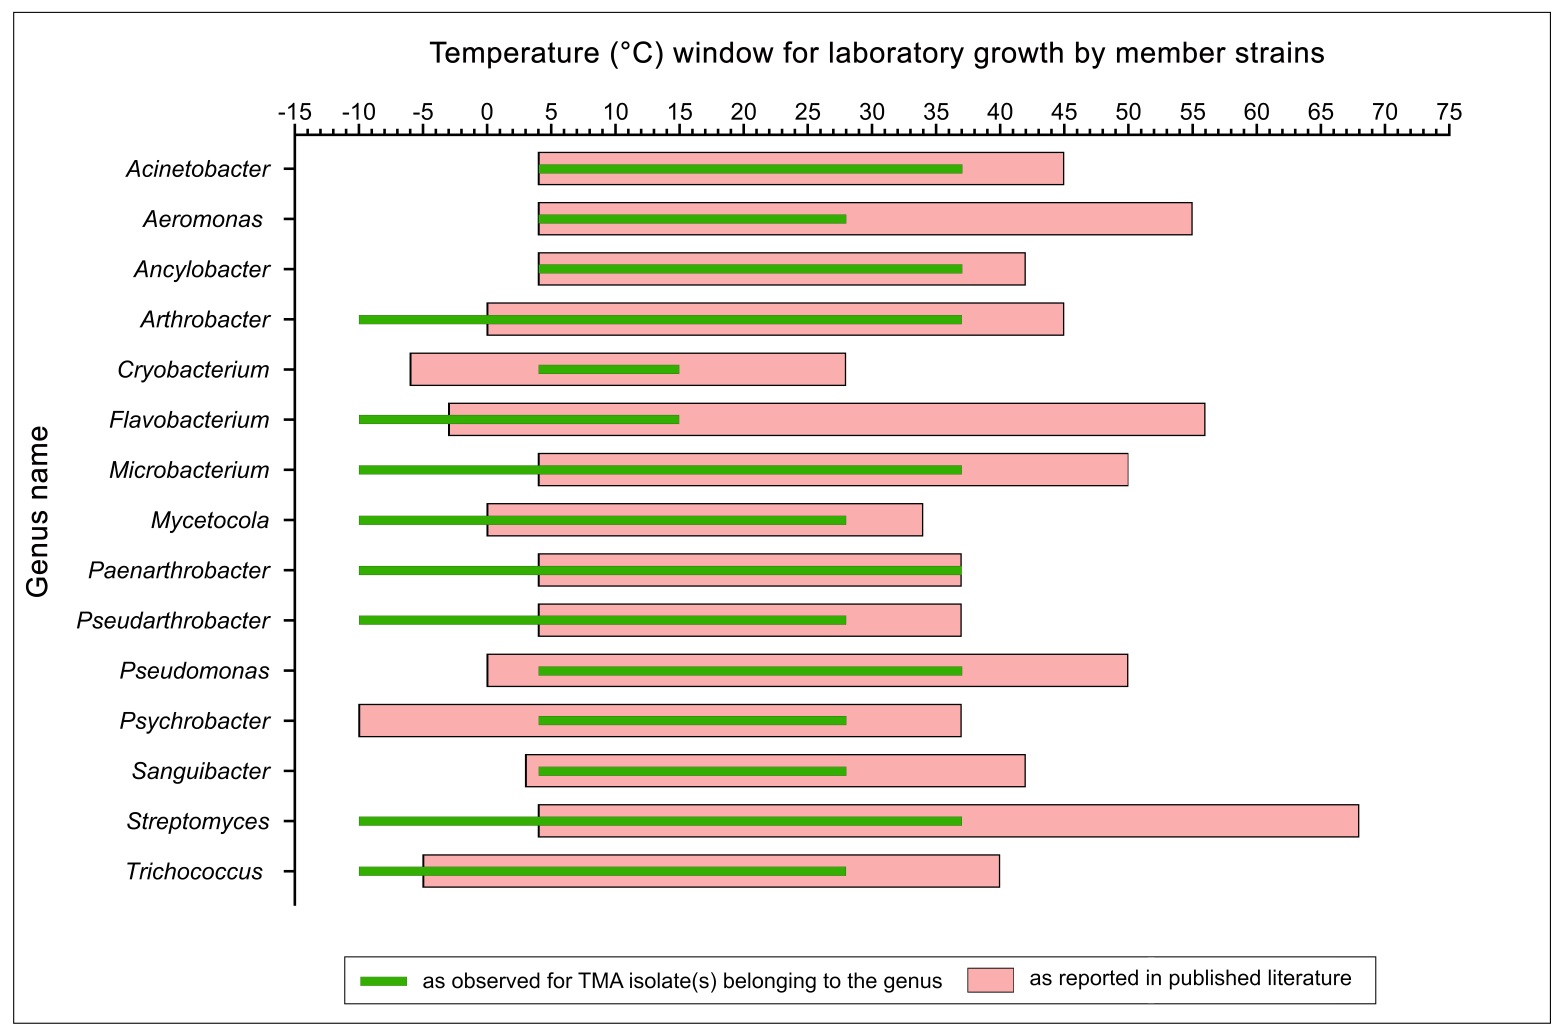** |
| --- |
| **Fig. S7.** Growth temperature windows of the bacterial genera under which the different TMA isolates were classified. Data obtained for the present isolates have been depicted in the context of the data available in the literature for their global relatives (see Table S60, and Supplementary References, for the detailed information). |

**Supplementary References**

**References used in Table S58**

Bajerski F, Ganzert L, Mangelsdorf K et al (2011) *Cryobacterium arcticum* sp. nov., a psychrotolerant bacterium from an Arctic soil. Int J Syst Evol Microbiol 61:1849–1853. <https://doi.org/10.1099/ijs.0.027128-0>

Bakermans C, Ayala-del-Río HL, Ponder MA et al (2006) *Psychrobacter cryohalolentis* sp. nov. and *Psychrobacter arcticus* sp. nov., isolated from Siberian permafrost. Int J Syst Evol Microbiol 56:1285–1291. <https://doi.org/10.1099/ijs.0.64043-0>

Balcázar W, Olave J, Muñoz P, Guerrero L et al (2015) Bioprospecting glacial ice for plant growth promoting bacteria. Microbiol Res 178:48–56. <https://doi.org/10.1016/j.micres.2015.05.001>

Berestovskaya YY, Tourova TP, Grouzdev DS et al (2025) *Cryobacterium inferilacus* sp. nov., a psychrophilic ureolitic bacterium from Lake Untersee in Antarctica. Microorganisms 13:990. <https://doi.org/10.3390/microorganisms13050990>

Bernardet JF, Segers P, Vancanneyt M et al (1996) Cutting a Gordian knot: emended classification and description of the genus *Flavobacterium*. Int J Syst Bacteriol 46:128–148. <https://doi.org/10.1099/00207713-46-1-128>

Bowman JP, Cavanagh J, Austin JJ et al (1996) Novel *Psychrobacter* species from Antarctic ornithogenic soils. Int J Syst Evol Microbiol 46:841–848. <https://doi.org/10.1099/00207713-46-4-841>

Bowman JP, Nichols DS, McMeekin TA (1997) *Psychrobacter glacincola* sp. nov., a halotolerant, psychrophilic bacterium isolated from Antarctic sea ice. Syst Appl Microbiol 20:209–215. <https://doi.org/10.1016/S0723-2020(97)80067-7>

Bozal N, Montes MJ, Tudela E et al (2003) Characterization of several *Psychrobacter* strains isolated from Antarctic environments and description of *Psychrobacter luti* sp. nov. and *Psychrobacter fozii* sp. nov. Int J Syst Evol Microbiol 53:1093–1100. <https://doi.org/10.1099/ijs.0.02457-0>

Carr EL, Kampfer P, Patel BK et al (2003) Seven novel species of *Acinetobacter* isolated from activated sludge. Int J Syst Evol Microbiol 53:953–963. <https://doi.org/10.1099/ijs.0.02486-0>

Carrasco V, Vargas-Reyes M, Lagos-Moraga S et al (2024) *Rhodococcus navarretei* sp. nov. and *Pseudarthrobacter quantipunctorum* sp. nov., two novel actinobacterial species isolated from Antarctic soil that biosynthesize fluorescent nanoparticles. Int J Syst Evol Microbiol 74:6536. <https://doi.org/10.1099/ijsem.0.006536>

Dai YM, Zhang LL, Li Y et al (2018) Characterization of *Trichococcus paludicola* sp. nov. and *Trichococcus alkaliphilus* sp. nov., isolated from a high-elevation wetland, by phenotypic and genomic analyses. Int J Syst Evol Microbiol 68:99–105. <https://doi.org/10.1099/ijsem.0.002464>

Ganzert L, Bajerski F, Mangelsdorf K et al (2011) *Arthrobacter livingstonensis* sp. nov. and *Arthrobacter cryotolerans* sp. nov., salt-tolerant and psychrotolerant species from Antarctic soil. Int J Syst Evol Microbiol 61:979–984. <https://doi.org/10.1099/ijs.0.021022-0>

Ge HY, Hu YQ, Zeng YX et al (2024) *Pseudomonas huanghezhanensis* sp. nov. and *Pseudomonas fjordensis* sp. nov., two novel species isolated from seawater of Arctic Kongsfjorden in the Ny-Ålesund area, Svalbard. Int J Syst Evol Microbiol 74:006584. <https://doi.org/10.1099/ijsem.0.006584>

Gong C, Lai Q, Cai H et al (2020) *Cryobacterium soli* sp. nov., isolated from forest soil. Int J Syst Evol Microbiol 70:675–679. <https://doi.org/10.1099/ijsem.0.003820>

Hong SG, Lee YK, Yim JH et al (2008) *Sanguibacter antarcticus* sp. nov., isolated from Antarctic sea sand. Int J Syst Evol Microbiol 58:50–52. <https://doi.org/10.1099/ijs.0.65031-0>

Kadum H, Isa SA, Muhammad K (2024) Molecular detection of *Aeromonas hydrophila* from frozen fish; a food quality and safety concern. Pak J Life Soc Sci 22: 4242-4247. <https://doi.org/10.57239/PJLSS-2024-22.1.00310>

Kamjam M, Nopnakorn P, Zhang L et al (2019) *Streptomyces polaris* sp. nov. and *Streptomyces septentrionalis* sp. nov., isolated from frozen soil. Antonie van Leeuwenhoek 112:375–387. <https://doi.org/10.1007/s10482-018-1166-x>

Li J, Tian XP, Zhu TJ et al (2011) *Streptomyces fildesensis* sp. nov., a novel streptomycete isolated from Antarctic soil. Antonie Van Leeuwenhoek 100:537–543. <https://doi.org/10.1007/s10482-011-9609-7>

Liu Q, Liu H, Wen Y et al (2012) *Cryobacterium flavum* sp. nov. and *Cryobacterium luteum* sp. nov., isolated from glacier ice. Int J Syst Evol Microbiol 62:1296–1299. <https://doi.org/10.1099/ijs.0.033738-0>

Liu Q, Liu H, Zhang J et al (2013) *Cryobacterium levicorallinum* sp. nov., a psychrophilic bacterium isolated from glacier ice. Int J Syst Evol Microbiol 63:2819–2822. <https://doi.org/10.1099/ijs.0.046896-0>

Liu Q, Xin YH, Chen XL et al (2018a) *Arthrobacter* *ruber* sp. nov., isolated from glacier ice. Int J Syst Evol Microbiol 68:1616–1621. <https://doi.org/10.1099/ijsem.0.002719>

Liu Q, Xin YH, Chen XL et al (2018b) *Cryobacterium aureum* sp. nov., a psychrophilic bacterium isolated from glacier ice collected from the ice tongue surface. Int J Syst Evol Microbiol 68:1173–1176. <https://doi.org/10.1099/ijsem.0.002647>

Liu Q, Liu HC, Zhou YG et al (2019a) Genetic diversity of glacier-inhabiting *Cryobacterium* bacteria in China and description of *Cryobacterium zongtaii* sp. nov. and *Arthrobacter glacialis* sp. nov. Syst Appl Microbiol 42:168–177. <https://doi.org/10.1016/j.syapm.2018.10.005>

Liu Q, Tian JH, Liu HC et al (2019b) *Cryobacterium melibiosiphilum* sp. nov., a psychrophilic bacterium isolated from glacier ice. Int J Syst Evol Microbiol 69:3276–3280. <https://doi.org/10.1099/ijsem.0.003620>

Liu Q, Tian JH, Liu HC et al (2020) *Cryobacterium ruanii* sp. nov. and *Cryobacterium breve* sp. nov., isolated from glaciers. Int J Syst Evol Microbiol 70:1918-1923. <https://doi.org/10.1099/ijsem.0.003994>

Liu Q, Yang LL, Xin YH (2023) Diversity of the genus *Cryobacterium* and proposal of 19 novel species isolated from glaciers. Front Microbiol 14:1115168. <https://doi.org/10.3389/fmicb.2023.1115168>

López NI, Pettinari MJ, Stackebrandt E et al (2009) *Pseudomonas extremaustralis* sp. nov., a poly(3-hydroxybutyrate) producer isolated from an Antarctic environment. Curr Microbiol 59:514–519. <https://doi.org/10.1007/s00284-009-9469-9>

Margesin R, Schumann P, Zhang DC et al (2012) *Arthrobacter cryoconiti* sp. nov., a psychrophilic bacterium isolated from alpine glacier cryoconite. Int J Syst Evol Microbiol 62:397–402. <https://doi.org/10.1099/ijs.0.031138-0>

McCammon SA, Innes BH, Bowman JP et al (1998) *Flavobacterium hibernum* sp. nov., a lactose-utilizing bacterium from a freshwater Antarctic lake. Int J Syst Evol Microbiol 48:1405–1412. <https://doi.org/10.1099/00207713-48-4-1405>

McCammon SA, Innes BH, Bowman JP et al (2000) Taxonomy of Antarctic *Flavobacterium* species: description of *Flavobacterium gillisiae* sp. nov., *Flavobacterium tegetincola* sp. nov. and *Flavobacterium xanthum* sp. nov., nom. rev., and reclassification of *[Flavobacterium*] *salegens* as *Salegentibacter salegens* gen. nov., comb. nov. Int J Syst Evol Microbiol 50:1055–1063. <https://doi.org/10.1099/00207713-50-3-1055>

Nimkande VD, Krishnamurthi K, Bafana A (2023) Potential of Antarctic lipase from *Acinetobacter johnsonii* Ant12 for treatment of lipid-rich wastewater: screening, production, properties and applications. Biodegradation 34:549–566. <https://doi.org/10.1007/s10532-023-10041-6>

Nogi Y, Soda K, Oikawa T (2005) *Flavobacterium frigidimaris* sp. nov., isolated from Antarctic seawater. Syst Appl Microbiol 28:310–315. <https://doi.org/10.1016/j.syapm.2005.01.001>

Opazo-Capurro A, Higgins PG, Wille J, Seifert H et al (2019) Genetic features of Antarctic *Acinetobacter radioresistens* strain A154 harboring multiple antibiotic-resistance genes. Front Cell Infect Microbiol 9:328. <https://doi.org/10.3389/fcimb.2019.00328>

Park M, Kim J (2024) *Arthrobacter horti* sp. nov., isolated from mountain soil. Int J Syst Evol Microbiol 74:006459. <https://doi.org/10.1099/ijsem.0.006459>

Paun VI, Lavin P, Chifiriuc MC et al (2021) First report on antibiotic resistance and antimicrobial activity of bacterial isolates from 13,000-year old cave ice core. Sci Rep 11:514. <https://doi.org/10.1038/s41598-020-79754-5>

Pavlov MS, Lira F, Martinez JL et al (2020) *Pseudomonas fildesensis* sp. nov., a psychrotolerant bacterium isolated from Antarctic soil of King George Island, South Shetland Islands. Int J Syst Evol Microbiol 70:3255–3263. <https://doi.org/10.1099/ijsem.0.004165>

Pazos C, Gualoto M, Oña T et al (2025) Molecular detection of blaTEM and blaSHV genes in ESBL-producing *Acinetobacter baumannii* isolated from Antarctic soil. Microorganisms 13:482. <https://doi.org/10.3390/microorganisms13030482>

Pikuta EV, Hoover RB, Bej AK et al (2006) *Trichococcus patagoniensis* sp. nov., a facultative anaerobe that grows at −5 C, isolated from penguin guano in Chilean Patagonia. Int J Syst Evol Microbiol 56:2055–2062. <https://doi.org/10.1099/ijs.0.64225-0>

Pikuta EV, Lyu Z, Williams MD et al (2017) *Sanguibacter gelidistatuariae* sp. nov., a novel psychrotolerant anaerobe from an ice sculpture in Antarctica, and emendation of descriptions of the family *Sanguibacteraceae*, the genus *Sanguibacter* and species *S*. *antarcticus*, *S*. *inulinus*, *S*. *kedieii*, *S*. *marinus*, *S*. *soli* and *S*. *suarezii*. Int J Syst Evol Microbiol 67:1442–1450. <https://doi.org/10.1099/ijsem.0.001838>

Pindi PK, Manorama R, Begum Z et al (2010) *Arthrobacter antarcticus* sp. nov., isolated from an Antarctic marine sediment. Int J Syst Evol Microbiol 60:2263–2266. <https://doi.org/10.1099/ijs.0.012989-0>

Rakitin AL, Ermakova AY, Beletsky AV et al (2021) Genome analysis of *Acinetobacter lwoffii* strains isolated from permafrost soils aged from 15 thousand to 1.8 million years revealed their close relationships with present-day environmental and clinical isolates. Biology 10:871. <https://doi.org/10.3390/biology10090871>

Reddy GS, Pradhan S, Manorama R et al (2010) *Cryobacterium roopkundense* sp. nov., a psychrophilic bacterium isolated from glacial soil. Int J Syst Evol Microbiol 60:866–870. <https://doi.org/10.1099/ijs.0.011775-0>

Shen L, Liu Y, Yao T et al (2013) *Mycetocola zhadangensis* sp. nov., isolated from snow. Int J Syst Evol Microbiol 63:3375–3378. <https://doi.org/10.1099/ijs.0.047159-0>

Shin Y, Lee BH, Lee KE et al (2020) *Pseudarthrobacter psychrotolerans* sp. nov., a cold-adapted bacterium isolated from Antarctic soil. Int J Syst Evol Microbiol 70:6106–6114. <https://doi.org/10.1099/ijsem.0.004505>

Shivaji S, Reddy GS, Suresh K et al (2005) *Psychrobacter vallis* sp. nov. and *Psychrobacter aquaticus* sp. nov., from Antarctica. Int J Syst Evol Microbiol 55:757–762. <https://doi.org/10.1099/ijs.0.03030-0>

Soriano-Vargas E, Castro-Escarpulli G, Aguilera-Arreola MG et al (2010) Isolation and identification of *Aeromonas bestiarum* in cultured common carp (*Cyprinus carpio* L.) from Santa Maria Chapa de Mota, Estado de Mexico, Mexico. Vet Méx 41:111–115. <https://veterinariamexico.fmvz.unam.mx/index.php/vet/article/view/256>

Suzuki K, Sasaki J, Uramoto M et al (1997) *Cryobacterium psychrophilum* gen. nov., sp. nov., nom. rev., comb. nov., an obligately psychrophilic actinomycete to accommodate "*Curtobacterium psychrophilum*" Inoue and Komagata 1976. Int J Syst Bacteriol 47:474–478. <https://doi.org/10.1099/00207713-47-2-474>

Valenzuela-Ibaceta F, Carrasco V, Lagos-Moraga S et al (2023) *Arthrobacter vasquezii* sp. nov., isolated from a soil sample from Union Glacier, Antarctica. Int J Syst Evol Microbiol 73:006095. <https://doi.org/10.1099/ijsem.0.006095>

Van Trappen S, Mergaert J, Swings J (2003) *Flavobacterium gelidilacus* sp. nov., isolated from microbial mats in Antarctic lakes. Int J Syst Evol Microbiol 53:1241–1245. <https://doi.org/10.1099/ijs.0.02583-0>

Van Trappen S, Vandecandelaere I, Mergaert J et al (2005) *Flavobacterium fryxellicola* sp. nov. and *Flavobacterium psychrolimnae* sp. nov., novel psychrophilic bacteria from Antarctic lakes. Int J Syst Evol Microbiol 55:769–772. <https://doi.org/10.1099/ijs.0.03056-0>

Vodickova P, Suman J, Benesova E et al (2022) *Arthrobacter polaris* sp. nov., a new cold-adapted member of the family *Micrococcaceae* isolated from Antarctic fellfield soil. Int J Syst Evol Microbiol 72:005541. <https://doi.org/10.1099/ijsem.0.005541>

Wang F, Gai Y, Chen M, Xiao X (2009) *Arthrobacter psychrochitiniphilus* sp. nov., a psychrotrophic bacterium isolated from Antarctica. Int J Syst Evol Microbiol 59:2759–2762. <https://doi.org/10.1099/ijs.0.008912-0>

Xin YH, Liang ZH, Zhang DC et al (2009) *Flavobacterium tiangeerense* sp. nov., a cold-living bacterium isolated from a glacier. Int J Syst Evol Microbiol 59:2773–2777. <https://doi.org/10.1099/ijs.0.007906-0>

Yang LL, Liu HC, Liu Q et al (2021) *Arthrobacter cheniae* and *Arthrobacter frigidicola* sp. nov., isolated from a glacier. Int J Syst Evol Microbiol 71:005177. <https://doi.org/10.1099/ijsem.0.005177>

Yang LL, Liu HC, Xin YH (2023) *Flavobacterium frigoritolerans* sp. nov. and *Flavobacterium shii* sp. nov., isolated from glaciers on the Tibetan Plateau. Int J Syst Evol Microbiol 73:5750. <https://doi.org/10.1099/ijsem.0.005750>

Yin CC, Yang LL, Xin YH et al (2023) Identification of *Flavobacterium algoritolerans* sp. nov. and *Flavobacterium yafengii* sp. nov., two novel members of the genus *Flavobacterium*. Int J Syst Evol Microbiol 73:006072. <https://doi.org/10.1099/ijsem.0.006072>

Yu X, Zhang W, Zhang G et al (2022) *Arthrobacter antioxidans* sp. nov., a blue pigment-producing species isolated from Mount Everest. Int J Syst Evol Microbiol 72:005624. <https://doi.org/10.1099/ijsem.0.005624>

Zakharyuk A, Valyshev A, Plotnikov A et al (2021) *Trichococcus shcherbakoviae* subsp. psychrophilus subsp. nov., a psychrotolerant facultative anaerobe isolated from a cold spring. Int J Syst Evol Microbiol 71:005068. <https://doi.org/10.1099/ijsem.0.005068>

Zeng YX, Yu Y, Li HR et al (2015) *Psychrobacter fjordensis* sp. nov., a psychrotolerant bacterium isolated from an Arctic fjord in Svalbard. Antonie Van Leeuwenhoek 108:1283–1292. <https://doi.org/10.1007/s10482-015-0580-6>

Zeng YX, Liu Y, Yu Y et al (2016) *Psychrobacter glaciei* sp. nov., isolated from the ice core of an Arctic glacier. Int J Syst Evol Microbiol 66:1792–1798. <https://doi.org/10.1099/ijsem.0.000939>

Zhang DC, Wang HX, Liu HC et al (2006) *Flavobacterium glaciei* sp. nov., a novel psychrophilic bacterium isolated from the China No.1 glacier. Int J Syst Evol Microbiol 56:2921–2925. <https://doi.org/10.1099/ijs.0.64564-0>

Zhang DC, Wang HX, Cui HL et al (2007) *Cryobacterium psychrotolerans* sp. nov., a novel psychrotolerant bacterium isolated from the China No. 1 glacier. Int J Syst Evol Microbiol 57:866–869. <https://doi.org/10.1099/ijs.0.64750-0>

Zhang DC, Schumann P, Liu HC et al (2010) *Arthrobacter alpinus* sp. nov., a psychrophilic bacterium isolated from alpine soil. Int J Syst Evol Microbiol 60:2149–2153. <https://doi.org/10.1099/ijs.0.017178-0>

Zhang GQ, Liu Q, Liu HC et al (2019) *Flavobacterium ranwuense* sp. nov., isolated from glacier. Int J Syst Evol Microbiol 69:3812–3817. <https://doi.org/10.1099/ijsem.0.003687>

Zhang J, Yu X, Guan B et al (2022) Identification and characterization of a novel cold-adapted GH15 family trehalase from the psychrotolerant *Microbacterium phyllosphaerae* LW106. Fermentation 8:471. <https://doi.org/10.3390/fermentation8100471>

Zhang L, Ruan C, Peng F et al (2016) *Streptomyces arcticus* sp. nov., isolated from frozen soil. Int J Syst Evol Microbiol 66:1482–1487. <https://doi.org/10.1099/ijsem.0.000907>

Zhu L, Liu Q, Liu H et al (2013) *Mycetocola miduiensis* sp. nov., a psychrotolerant bacterium isolated from Midui glacier. Int J Syst Evol Microbiol 63:2661–2665. <https://doi.org/10.1099/ijs.0.047985-0>

**References used in Table S59**

Antunes LC, Imperi F, Carattoli A et al (2011) Deciphering the multifactorial nature of *Acinetobacter baumannii* pathogenicity. PLoS One 6:e22674. <https://doi.org/10.1371/journal.pone.0022674>

Dastager SG, Qin L, Tang SK et al (2014) *Arthrobacter enclensis* sp. nov., isolated from sediment sample. Arch Microbiol 196:775–782. <https://doi.org/10.1007/s00203-014-1016-9>

Ganbat D, Jeong GE, Oh D et al (2023) Description of *Microbacterium neungamense* sp. nov. isolated from a hot spring. Arch Microbiol 205:23. <https://doi.org/10.1007/s00203-022-03343-5>

Kampfer P, Albrecht A, Buczolits S et al (2002) *Psychrobacter faecalis* sp. nov., a new species from a bioaerosol originating from pigeon faeces. Syst Appl Microbiol 25:47-52. <https://doi.org/10.1078/0723-2020-00099>

Li FN, Zheng ZQ, Chen MS et al (2023) *Ancylobacter mangrovi* sp. nov., a novel endophytic bacterium isolated form mangrove plant. Syst Appl Microbiol 46:126419. <https://doi.org/10.1016/j.syapm.2023.126419>

Liu ZS, Wang KH, Wang XK et al (2025) *Curvibacter soli* sp. nov., *Extensimonas soli* sp. nov., *Pseudarthrobacter naphthalenicus* sp. nov. and *Terripilifer ovatus* gen. nov., sp. nov., four new species isolated from polluted soil. Int J Syst Evol Microbiol 75:6698. <https://doi.org/10.1099/ijsem.0.006698>

Ma Q, Lei RF, Li YQ et al (2021) *Sanguibacter suaedae* sp. nov., isolated from the root of *Suaeda aralocaspica* in north-west PR China. Int J Syst Evol Microbiol 71:005108. <https://doi.org/10.1099/ijsem.0.005108>

Manaia CM, Moore ER (2002) *Pseudomonas thermotolerans* sp. nov., a thermotolerant species of the genus *Pseudomonas sensu stricto*. Int J Syst Evol Microbiol 52:2203–2209. <https://doi.org/10.1099/00207713-52-6-2203>

Oh ET, Jeong JW, Kim SB (2024) *Paenarthrobacter aromaticivorans* sp. nov., a paraoxon-degrading bacterium isolated from red pepper cultivation soil. Int J Syst Evol Microbiol 74:6389. <https://doi.org/10.1099/ijsem.0.006389>

Saha P, Chakrabarti T (2006) *Aeromonas sharmana* sp. nov., isolated from a warm spring. Int J Syst Evol Microbiol 56:1905-1909. <https://doi.org/10.1099/ijs.0.63972-0>

Saiki T, Kimura R, Arima K (1972) Isolation and characterization of extremely thermophilic bacteria from hot springs. Agric Biol Chem 36:2357-2366. <https://doi.org/10.1080/00021369.1972.10860589>

Tsukamoto T, Takeuchi M, Shida O et al (2001) Proposal of *Mycetocola* gen. nov. in the family *Microbacteriaceae* and three new species, *Mycetocola saprophilus* sp. nov., *Mycetocola tolaasinivorans* sp. nov. and *Mycetocola lacteus* sp. nov., isolated from cultivated mushroom, *Pleurotus ostreatus*. Int J Syst Evol Microbiol 51:937-944. <https://doi.org/10.1099/00207713-51-3-937>

van Gelder AH, Aydin R, Alves MM et al (2012) 1, 3‐Propanediol production from glycerol by a newly isolated *Trichococcus* strain. Microb Biotechnol 5:573-578. <https://doi.org/10.1111/j.1751-7915.2011.00318.x>

Wang M, Cui J, Liu H et al (2023) Characterization of soil microbial biomass carbon and nitrogen in four forest types of shushan urban forest park. Forests 14:1498. <https://doi.org/10.3390/f14071498>

Xu LH, Tiang YQ, Zhang YF et al (1998) *Streptomyces thermogriseus*, a new species of the genus *Streptomyces* from soil, lake and hot-spring. Int J Syst Evol Microbiol 48:1089-1093. <https://doi.org/10.1099/00207713-48-4-1089>

**References used in Table S60**

Antunes LC, Imperi F, Carattoli A et al (2011) Deciphering the multifactorial nature of *Acinetobacter baumannii* pathogenicity. PLoS One 6:e22674. <https://doi.org/10.1371/journal.pone.0022674>

Bakermans C, Ayala-del-Río HL, Ponder MA et al (2006) *Psychrobacter cryohalolentis* sp. nov. and *Psychrobacter arcticus* sp. nov., isolated from Siberian permafrost. Int J Syst Evol Microbiol 56:1285–1291. <https://doi.org/10.1099/ijs.0.64043-0>

Dastager SG, Lee JC, Ju YJ, Park DJ, Kim CJ (2008) *Cryobacterium mesophilum* sp. nov., a novel mesophilic bacterium. Int J Syst Evol Microbiol 58:1241–1244. <https://doi.org/10.1099/ijs.0.65650-0>

Dastager SG, Qin L, Tang SK, et al (2014) *Arthrobacter enclensis* sp. nov., isolated from sediment sample. Arch Microbiol 196:775–782. <https://doi.org/10.1007/s00203-014-1016-9>

Hess E (1933) Effects of low temperatures on the growth of marine bacteria. Contrib Can Biol Fish 8:489–505. <https://doi.org/10.1139/f33-034>

Kallimanis A, Kavakiotis K, Perisynakis A et al (2009) *Arthrobacter phenanthrenivorans* sp. nov., to accommodate the phenanthrene-degrading bacterium *Arthrobacter* sp. strain Sphe3. Int J Syst Evol Microbiol 59:275–279. <https://doi.org/10.1099/ijs.0.000984-0>

Kotoučková L, Schumann P, Durnova E et al (2004) *Arthrobacter nitroguajacolicus* sp. nov., a novel 4-nitroguaiacol-degrading actinobacterium. Int J Syst Evol Microbiol 54:773–777. <https://doi.org/10.1099/ijs.0.02923-0>

Krovacek K, Faris A, Månsson I (1991) Growth of and toxin production by *Aeromonas hydrophila* and *Aeromonas sobria* at low temperatures. Int J Food Microbiol 13:165–175. <https://doi.org/10.1016/0168-1605(91)90058-w>

Liu Q, Liu H, Wen Y, Zhou Y, Xin Y (2012) *Cryobacterium flavum* sp. nov. and *Cryobacterium luteum* sp. nov., isolated from glacier ice. Int J Syst Evol Microbiol 62:1296–1299. <https://doi.org/10.1099/ijs.0.033738-0>

Loveland-Curtze J, Sheridan PP, Gutshall KR et al (1999) Biochemical and phylogenetic analyses of psychrophilic isolates belonging to the *Arthrobacter* subgroup and description of *Arthrobacter psychrolactophilus*, sp. nov. Arch Microbiol 171:355–363. <https://doi.org/10.1007/s002030050722>

Lyutskanova D, Ivanova V, Stoilova-Disheva M et al (2009) Isolation and characterization of a psychrotolerant *Streptomyces* strain from permafrost soil in spitsbergen, producing phthalic acid ester. Biotechnol Biotechnol Equip 23:1220–1224. <https://doi.org/10.1080/13102818.2009.10817642>

Ma Q, Lei RF, Li YQ, et al (2021) *Sanguibacter suaedae* sp. nov., isolated from the root of *Suaeda aralocaspica* in north-west PR China. Int J Syst Evol Microbiol 71:005108. <https://doi.org/10.1099/ijsem.0.005108>

Manaia CM, Moore ER (2002) *Pseudomonas thermotolerans* sp. nov., a thermotolerant species of the genus *Pseudomonas sensu stricto*. Int J Syst Evol Microbiol 52:2203–2209. <https://doi.org/10.1099/00207713-52-6-2203>

Molin G, Ternström A, Ursing J (1986) *Pseudomonas lundensis*, a new bacterial species isolated from meat. Int J Syst Evol Microbiol 36:339–342. <https://doi.org/10.1099/00207713-36-2-339>

Nie W, Zheng X, Wang S et al (2022) Genome resource of *Ancylobacter pratisalsi* E130T: a novel plant-growth-promoting bacterium isolated from the rhizosphere. Phytopathology 112:729–731. <https://doi.org/10.1094/PHYTO-06-21-0251-A>

Páčová Z, Urbanova E, Durnova E (2001) *Psychrobacter immobilis* isolated from foods: characteristics and identification. Czech J Food Sci 19:33–38

Paściak M, Pawlik KJ, Martynowski D, et al (2024) Discovery of a new bacterium, *Microbacterium betulae* sp. nov., in birch wood associated with hypersensitivity pneumonitis in woodworkers. Environ Microbiol Rep 16:e13311. <https://doi.org/10.1111/1758-2229.13311>

Pikuta EV, Hoover RB, Bej AK et al (2006) *Trichococcus patagoniensis* sp. nov., a facultative anaerobe that grows at −5 °C, isolated from penguin guano in Chilean Patagonia. Int J Syst Evol Microbiol 56:2055-2062. <https://doi.org/10.1099/ijs.0.64225-0>

Pikuta EV, Lyu Z, Williams MD, et al (2017) *Sanguibacter gelidistatuariae* sp. nov., a novel psychrotolerant anaerobe from an ice sculpture in Antarctica, and emendation of descriptions of the family *Sanguibacteraceae*, the genus *Sanguibacter* and species *S*. *antarcticus*, *S*. *inulinus*, *S*. *kedieii*, *S*. *marinus*, *S*. *soli* and *S*. *suarezii*. Int J Syst Evol Microbiol 67:1442–1450. <https://doi.org/10.1099/ijsem.0.001838>

Rouf MA, Rigney MM (1971) Growth temperatures and temperature characteristics of *Aeromonas*. Appl Microbiol 22:503–506. <https://doi.org/10.1128/am.22.4.503-506.1971>

Saiki T, Kimura R, Arima K (1972) Isolation and characterization of extremely thermophilic bacteria from hot springs. Agric Biol Chem 36:2357-2366. <https://doi.org/10.1080/00021369.1972.10860589>

van Gelder AH, Aydin R, Alves MM et al (2012) 1,3‐Propanediol production from glycerol by a newly isolated *Trichococcus* strain. Microb Biotechnol 5:573-578. <https://doi.org/10.1111/j.1751-7915.2011.00318.x>

Westerberg K, Elväng AM, Stackebrandt E et al (2000) *Arthrobacter* *chlorophenolicus* sp. nov., a new species capable of degrading high concentrations of 4-chlorophenol. Int J Syst Evol Microbiol 50:2083–2092. <https://doi.org/10.1099/00207713-50-6-2083>

Xu LH, Tiang YQ, Zhang YF et al (1998) *Streptomyces thermogriseus*, a new species of the genus Streptomyces from soil, lake and hot-spring. Int J Syst Evol Microbiol 48:1089-1093. <https://doi.org/10.1099/00207713-48-4-1089>

Yamahira K, Hirota K, Nakajima K et al (2008) *Acinetobacter* sp. strain Ths, a novel psychrotolerant and alkalitolerant bacterium that utilizes hydrocarbon. Extremophiles 12:729–734. <https://doi.org/10.1007/s00792-008-0180-8>

Yu L, Lai Q, Yi Z, et al (2013) *Microbacterium sediminis* sp. nov., a psychrotolerant, thermotolerant, halotolerant and alkalitolerant actinomycete isolated from deep-sea sediment. Int J Syst Evol Microbiol 63:25–30. <https://doi.org/10.1099/ijs.0.029652-0>

Zhu L, Liu Q, Liu H, et al (2013) *Mycetocola miduiensis* sp. nov., a psychrotolerant bacterium isolated from Midui glacier. Int J Syst Evol Microbiol 63:2661–2665. <https://doi.org/10.1099/ijs.0.047985-0>
